# Supplementary material for: Genome assembly and geospatial phylogenomics of the bed bug Cimex lectularius
Source: PubMed Central journal article supplement (PMC4740774; doi:10.1038/ncomms10164), 2016-02-02
Supplement: ncomms10164-s1.pdf [file ncomms10164-s1.pdf]

## Supplementary Figures

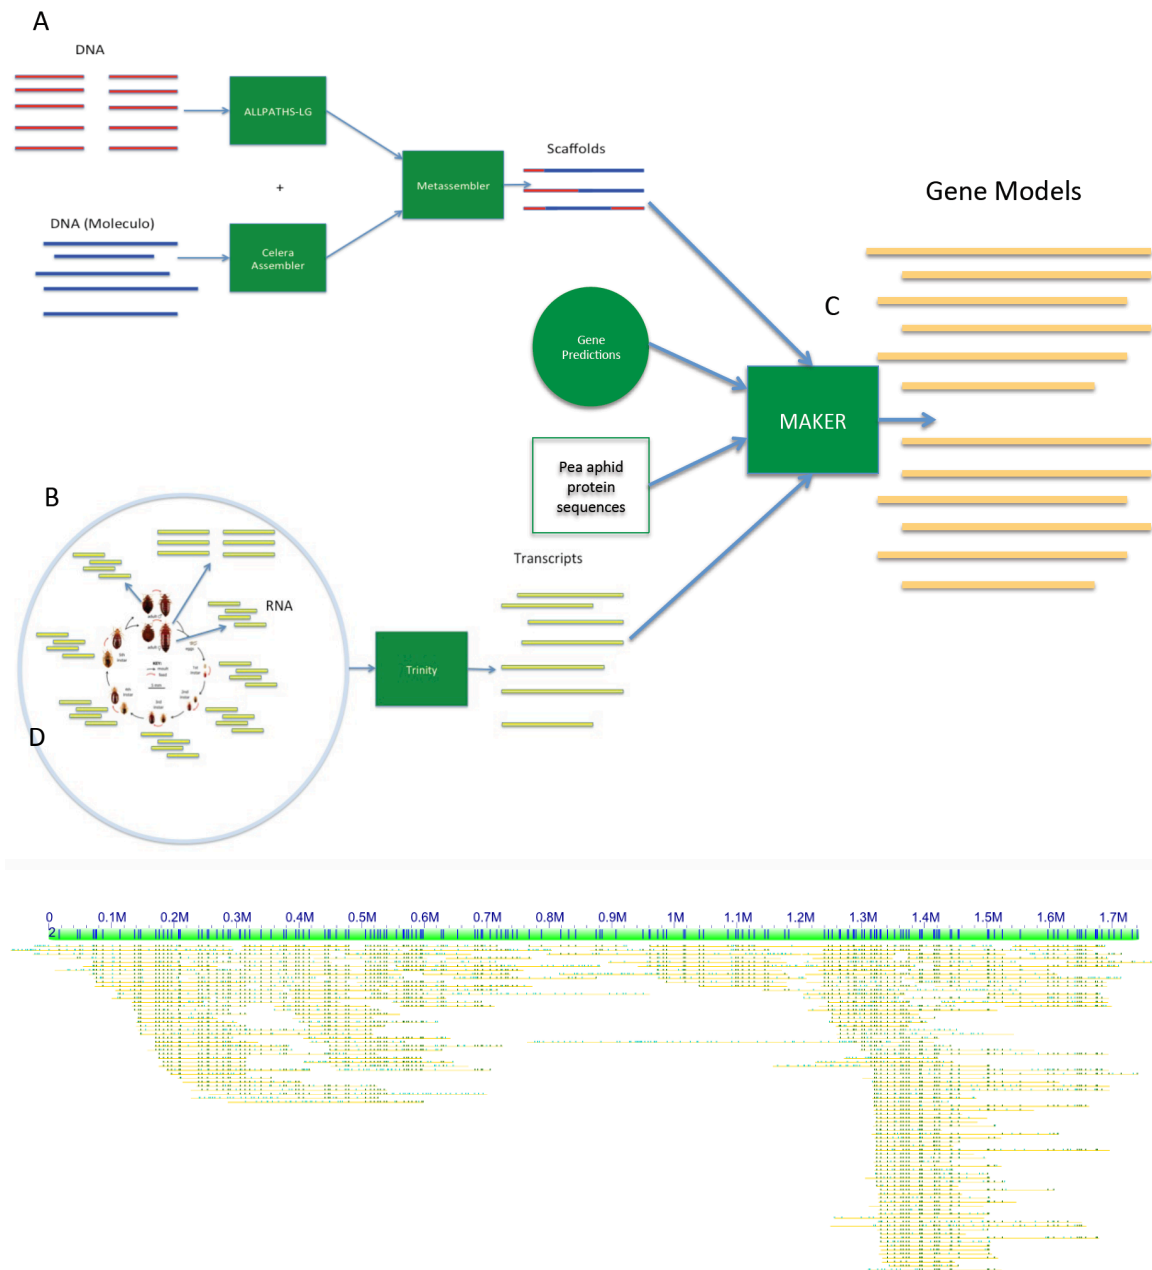

**Supplementary Figure 1. Genome sequence assembly and annotation pipeline.** (A) Both short (Illumina paired-end libraries) and long read (Molecule) methods were used to create raw data from DNA extracted from first instar nymphs prior to blood feeding. Reads were analyzed with ALLPATHS-LG and the Celera Assembler, respectively, and then merged with Metassembler to produce final scaffolds. (B) RNA-seq data from all developmental stages created with 50bp single-end reads, as well as one developmental stage with 100bp paired-end reads for improved assembly with Trinity. (C) Trinity transcripts combined with the pea aphid proteome and gene predictions fed into MAKER to create the final gene models and GTF files. (D) Single-molecule genome maps (yellow bar highlighting the DNA backbone, dark green labels showing aligned labels, and cyan labels showing unaligned labels) were aligned against the in-silico motif map of scaffold CLS00019.1 (green bar highlighting the scaffold, black bars showing the predicted label positions). Strong support across the entire 2.8-Mb sequence scaffold.

A

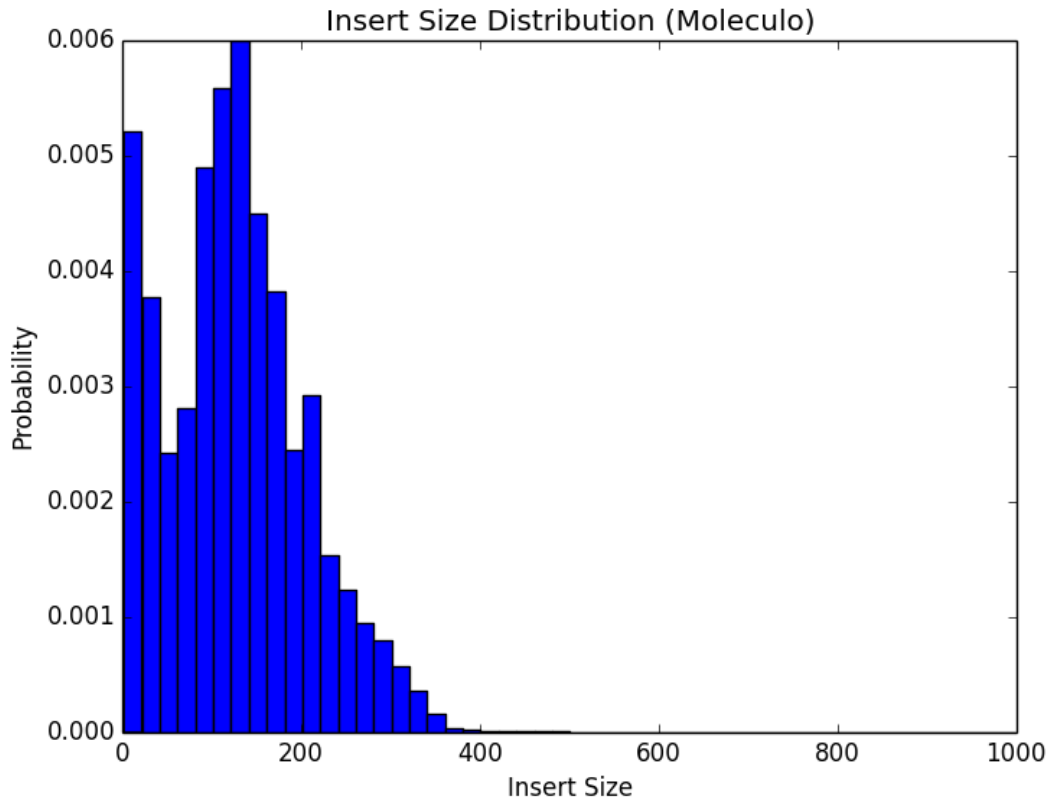

B

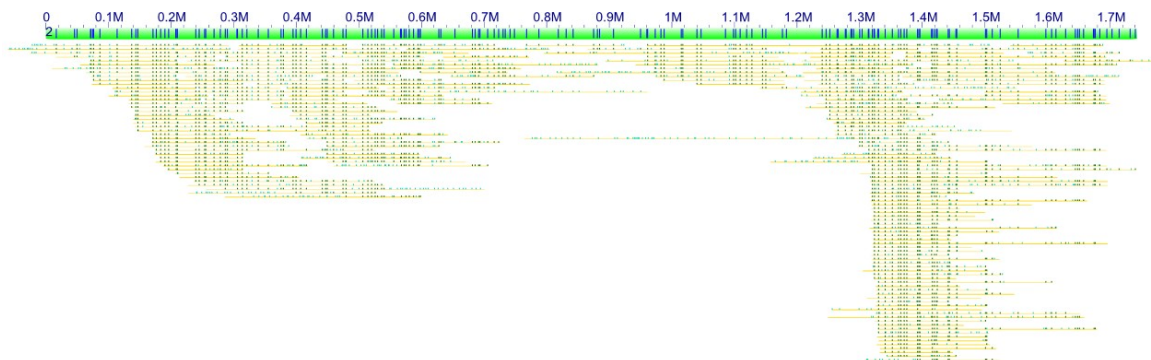

**Supplementary Figure 2. Genome assembly validations** (A) Distribution of overlapping paired read insert sizes based on Moleculo alignment. We plotted the proportion (*y*-axis) of fragments with varying estimated insert sizes (*x*-axis) from the alignment of short reads to the Moleculo long reads. These results show that the 185bp library was close to the expected size range for the assembly. (B) Single-molecule genome maps were aligned against the in-silico motif map of scaffold CLS00080. There is broad single-molecule support across the scaffold, but weaker support at around 0.8-0.9 Mb and around 1.2 Mb.

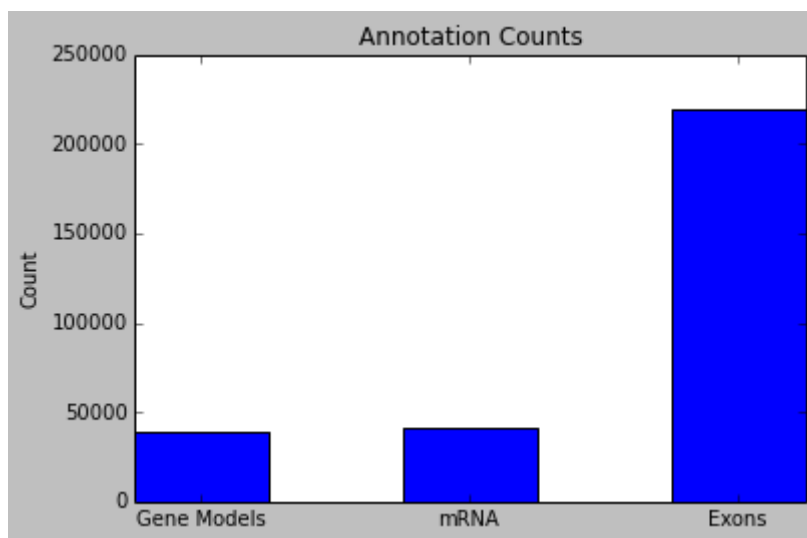

**Supplementary Figure 3. Summary of gene features from the assembly.** Data show the total number (*y*- axis) of various features from the MAKER-based genome sequence annotation, including gene models, mRNAs, and total number of exons (*x*-axis).

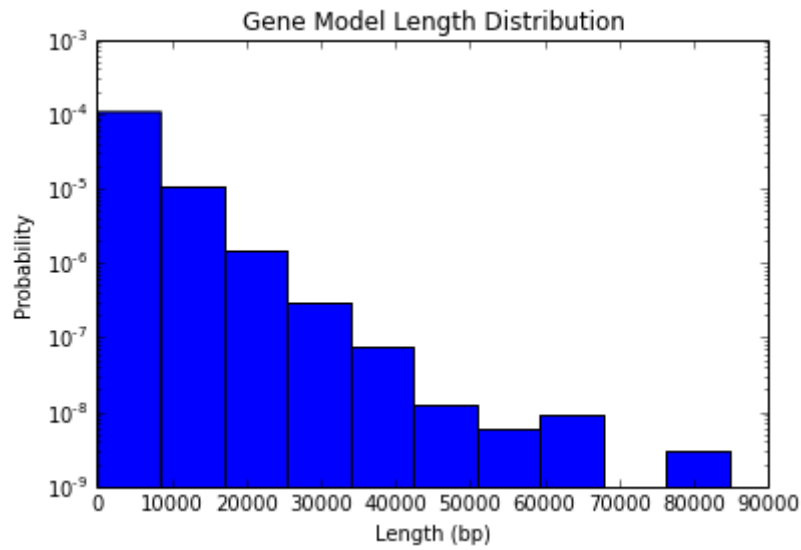

**Supplementary Figure 4. Distribution of gene model sizes.** The distribution of lengths for genes at varying bins (*x*-axis) is plotted as a function of their count (*y*-axis).

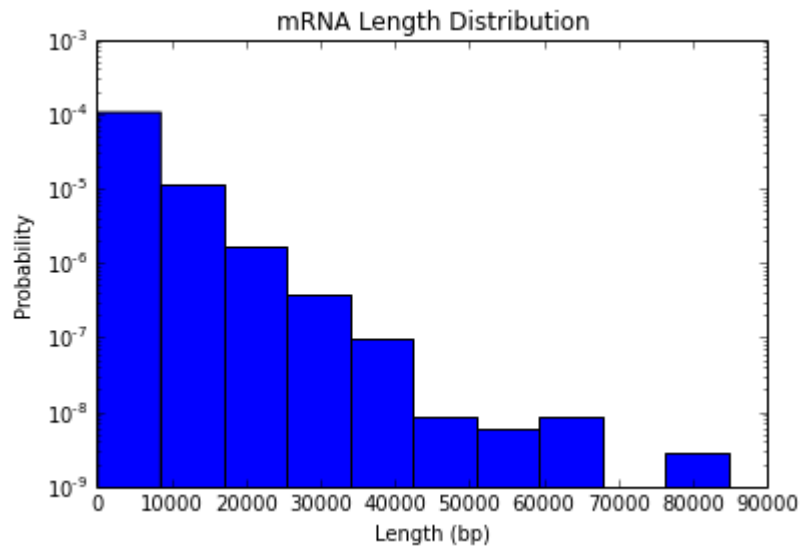

**Supplementary Figure 5. Distribution of mRNA model sizes.** The distribution of lengths for mRNAs at varying bins (*x*-axis) is plotted as a function of their count (*y*-axis).

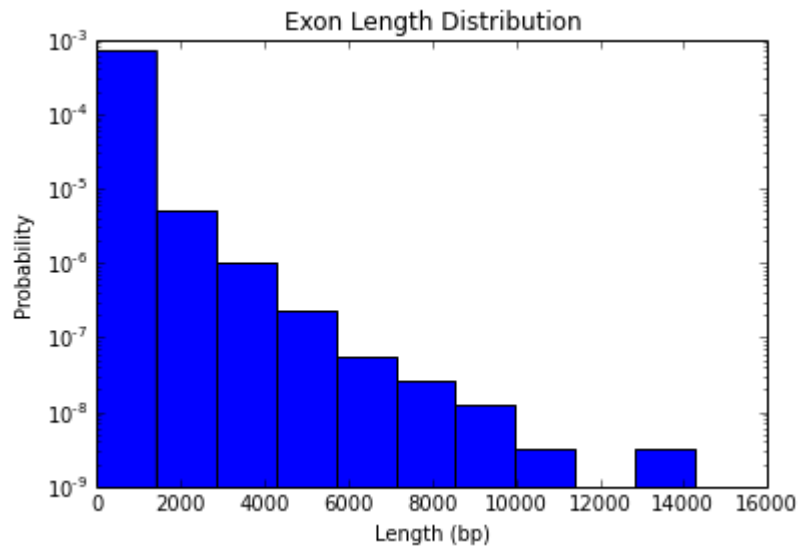

**Supplementary Figure 6. Distribution of exon sizes.** The distribution of lengths for exons at varying bins (*x*-axis) is plotted as a function of their count (*y*-axis).

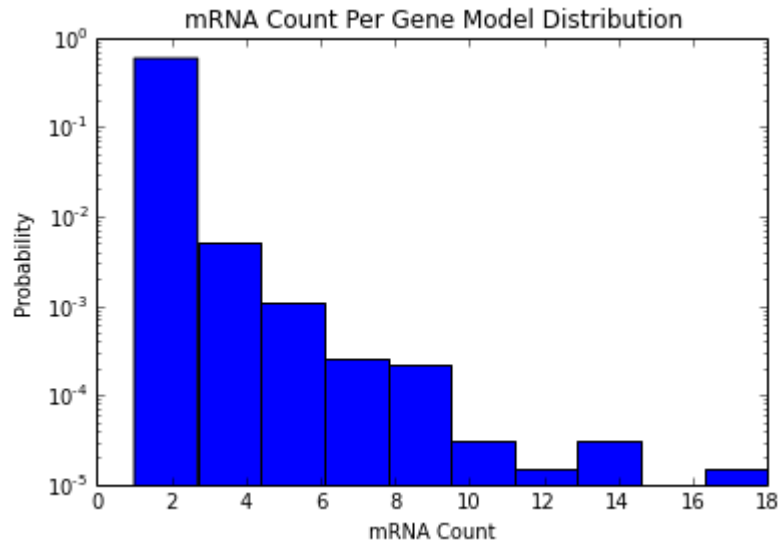

**Supplementary Figure 7. Distribution of mRNA counts per gene.** The distribution of counts of predicted mRNAs for each gene ( $y$ -axis) is plotted as a function of their bin ( $x$ -axis).

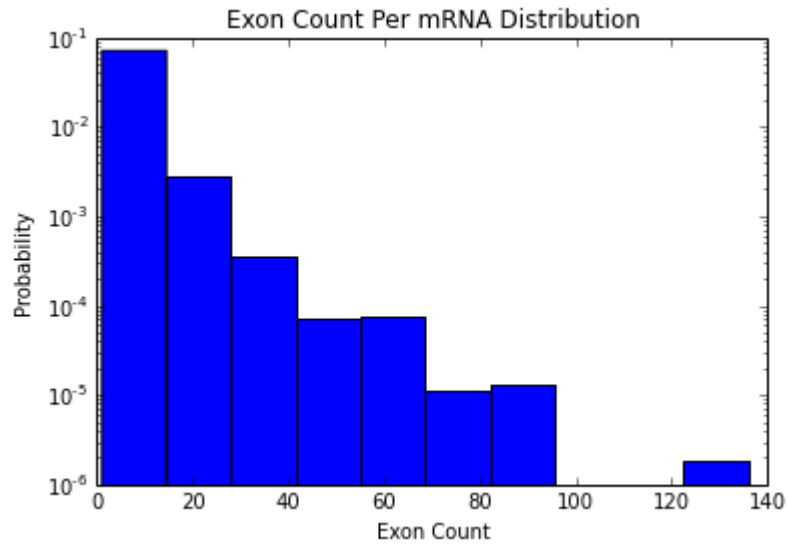

**Supplementary Figure 8. Distribution of exon counts per gene.** The distribution of counts of predicted exons for each gene ( $y$ -axis) is plotted as a function of their bin ( $x$ -axis).



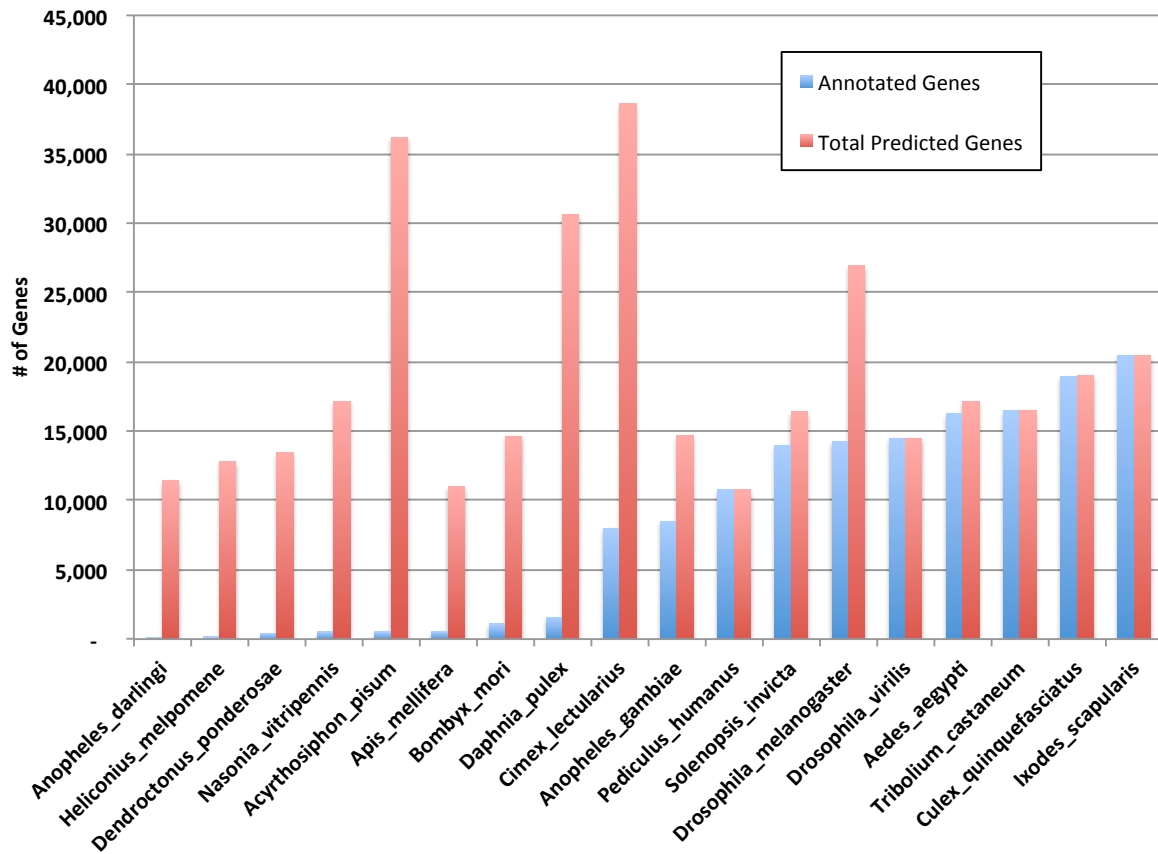

**Supplementary Figure 9. Comparison of *Cimex lectularius* genome annotation relative to other arthropods.** Number of annotated genes (blue) and the full set of genes (red) of the *C. lectularius* genome, showing the highest number of genes and an average number of annotated genes by UNIPROT.

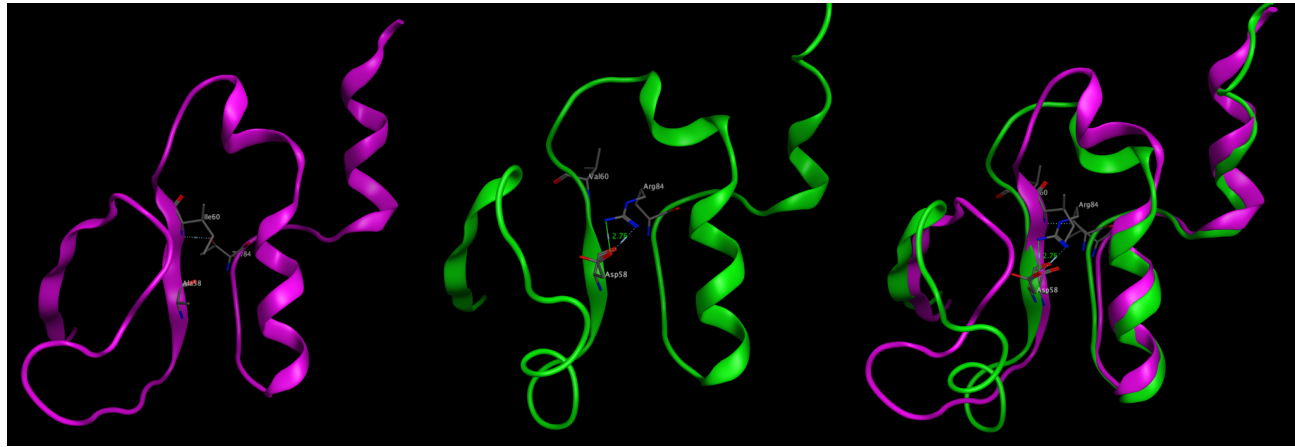

A

B

C

**Supplementary Figure 10. DDL protein three-dimensional structural modeling.** (A) wild type (magenta), (B) mutant (green), (C) structural model superposition. Based on computational modeling none of the eight observed amino acid substitutions (A58D, I60V, T84R, I93V, A98T, L104F, G108D, I109V) was directly involved in ATP binding. In the wild type protein, residues 58, 60 and 84 are in close proximity and form a hydrogen-bonding network that stabilizes loop formation in this region. The expectation was that a change from a small neutral to a larger charged residue (e.g. A58D, T84R) might cause reorganization of the loops. The comparison of the wild type and mutant DDL structural models suggests that a replacement to oppositely charged amino acids may lead to stronger interactions within this network. In addition to hydrogen bonds, strong ionic interactions occur between D58 and R84 in the mutant protein. This, in turn, leads to partial changes in adjacent flexible regions and may cause some alteration in ligase activity.

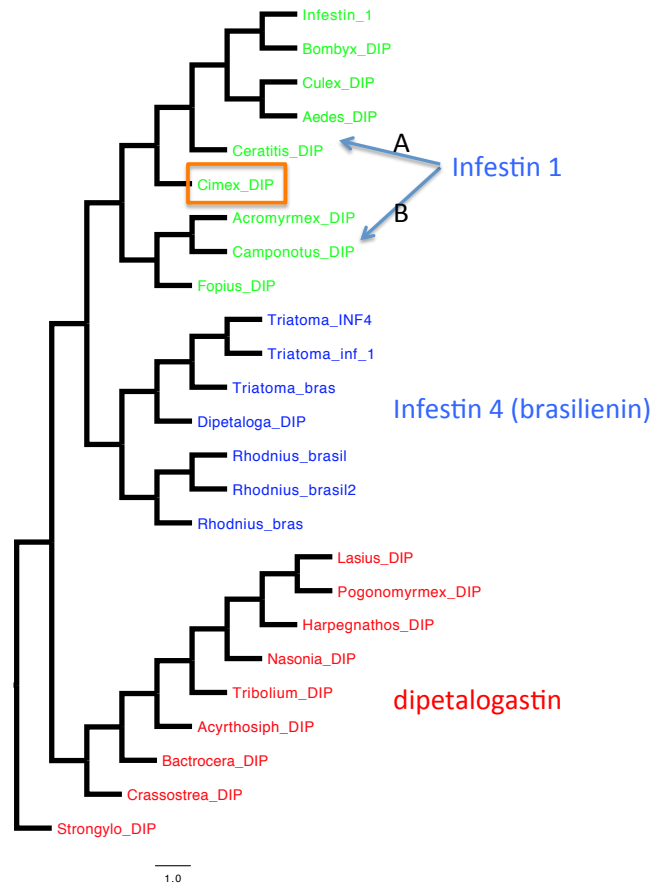

**Supplementary Figure 11. Phylogenetic tree of insect infestins.** The tree was generated using maximum parsimony and with a *Strongylocentrotus infestin* as an outgroup. Random Additions (n=100) were used with Tree Bisection Reconnection (TBR) branch swapping to obtain the tree. The colored names in the tree refer to the three major kinds of infestins that are suggested by this analysis. Red indicates the dipetalogastin family, the blue indicates the brasiliensin family (or infestin 4) and the green represents the infestin 1 family. The *Cimex* infestin is in the orange square.

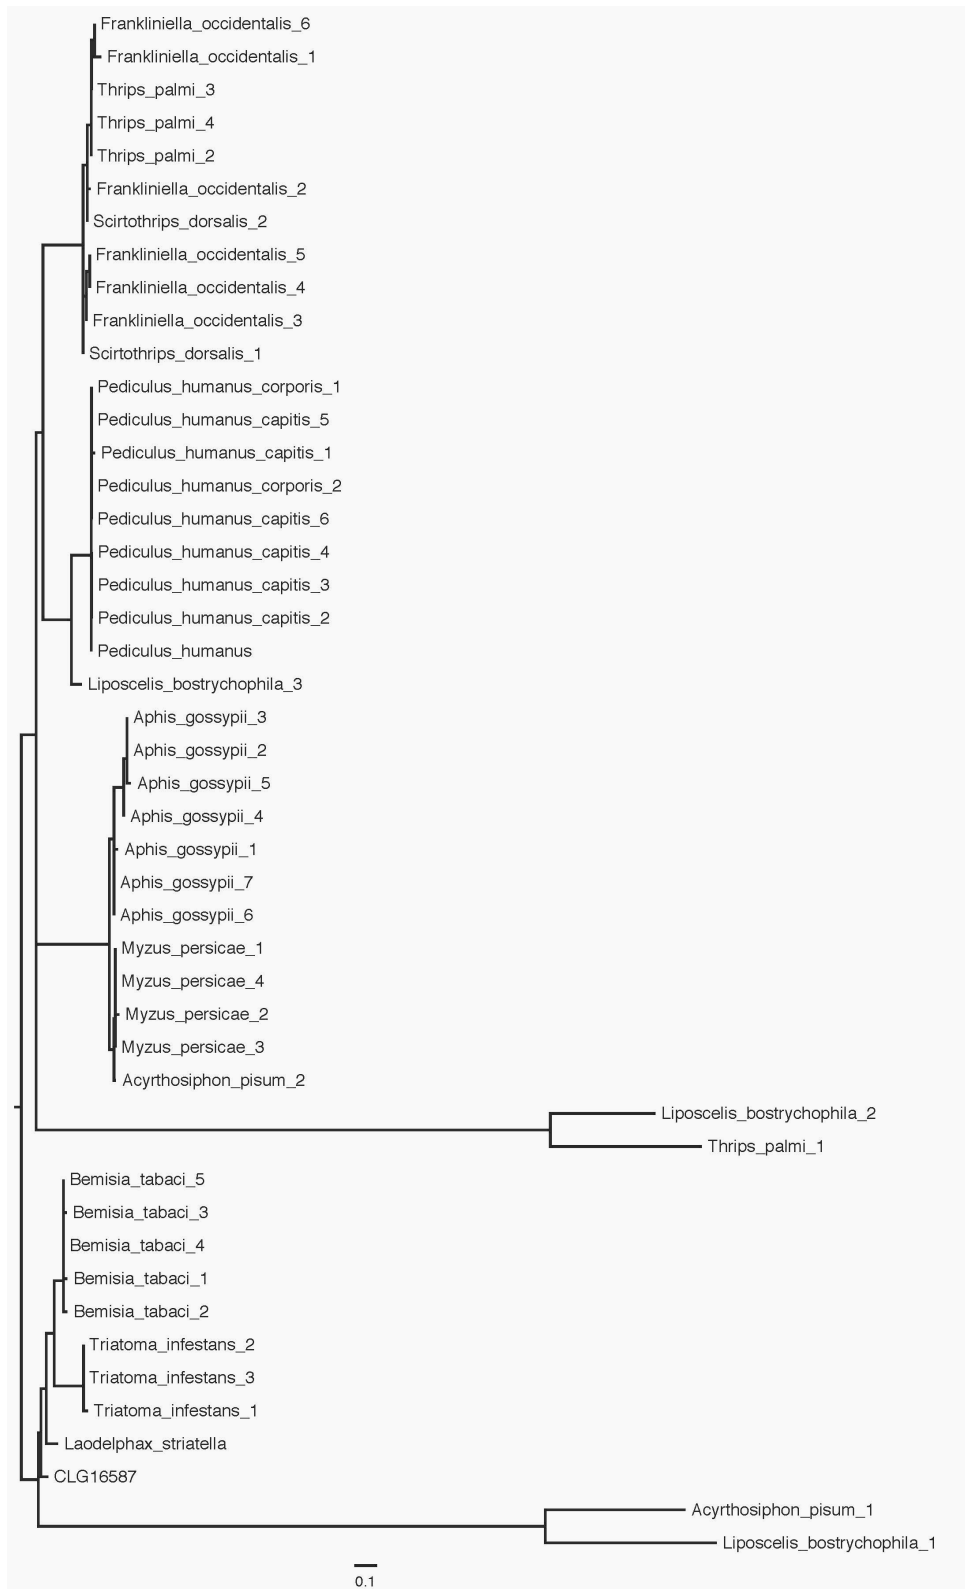

**Supplementary Figure 12. Voltage-gated sodium channel gene tree.** Maximum-likelihood tree showing the *Cimex lectularius* gene (CLG16587) clustering with other hemipteran homologs.

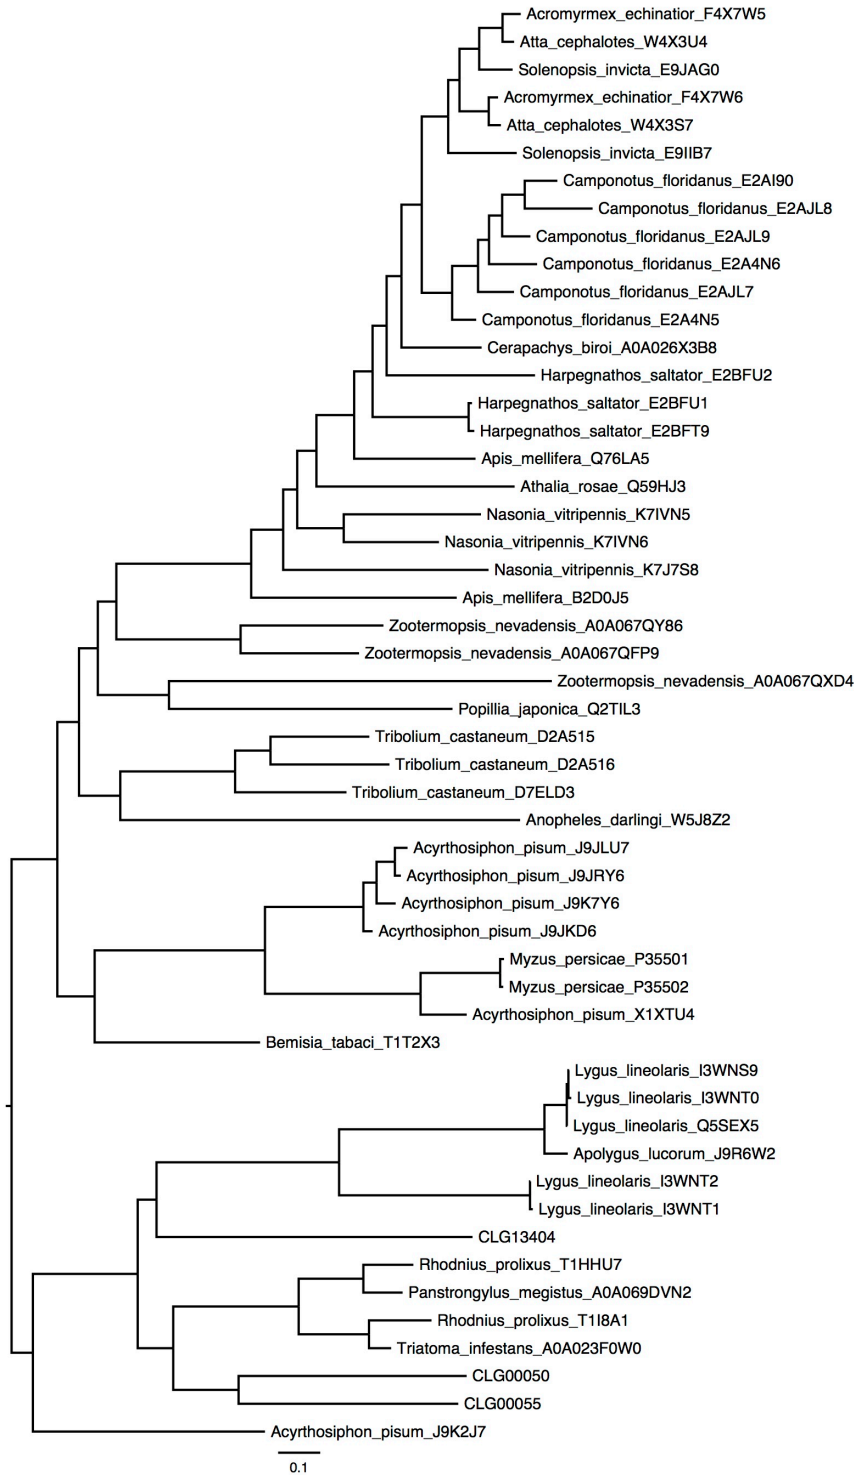

**Supplementary Figure 13. A phylogenetic tree of the bedbug and other insect esterase genes.**

Three bedbug homologs (CLG00050, CLG13404, CLG00055) were found in bedbug with partial identity to other blood-feeding hemipteran insects (kissing bugs, *R. prolixus* and *T. infestans*), nested within the main cimicomorph esterase clade. Same maximum likelihood scale as Supplemental Supplementary Figure 12.

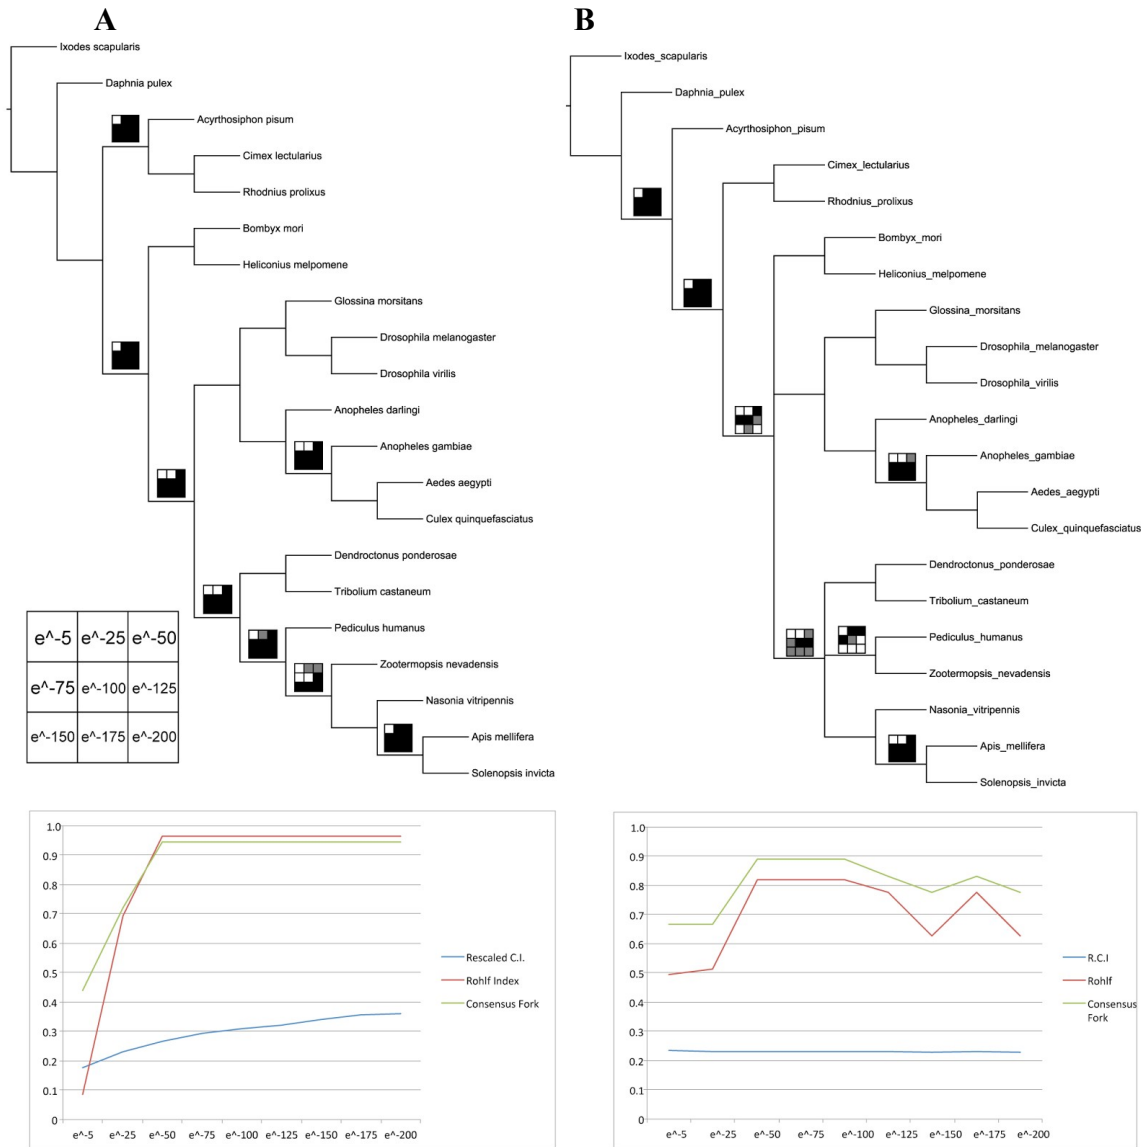

**Supplementary Figure 14. Evolutionary relationships based on gene presence-absence.** Panels (A) maximum parsimony and (B) maximum likelihood show the dynamics of E-value cutoff on the consistency of phylogenetic trees generated using the gene presence-absence information. Majority-rule consensus parsimony and likelihood trees were calculated (bootstrap = 10,000), and for both of the majority-rule topologies, the relative support of each gene family matrix is shown as "Navajo rugs" [3] at each node. Black boxes indicate nodal agreement, white boxes indicate disagreement, and gray boxes indicate agreement with bootstrap support > 70%. To measure character consistency, the Rescaled Consistency Index (RCI) [4] was computed. To measure nodal agreement, the Consensus Fork Index (CFI) [5] and Rohlf consensus index 1 [6] were computed. The graphs (panels C and D) examine the dynamics of E-value cutoff analyses. These figures demonstrate an optimal E-value cutoff in the range e-50–e-75 for this dataset. All nodes on this tree received 100% bootstrap support.

1 **Supplementary Tables**

2

**Supplemental Table 1 - Illumina libraries used in transcriptome assembly.**

| Source                 | Read type | Replicate 1   | Replicate 2 | Replicate 3 |
|------------------------|-----------|---------------|-------------|-------------|
| Adult                  | PE100     | 515376920 x 2 | NA          | NA          |
| 1 <sup>st</sup> Instar | SE50      | 4,886,399     | 6,313,424   | 5,778,247   |
| 2 <sup>nd</sup> Instar | SE50      | 4,591,633     | 5,982,408   | 4,670,338   |
| 3 <sup>rd</sup> Instar | SE50      | 3,817,205     | 5,241,204   | 5,576,136   |
| 4 <sup>th</sup> Instar | SE50      | 4,468,666     | 5,267,733   | 4,620,707   |
| 5 <sup>th</sup> Instar | SE50      | 4,626,900     | 5,659,537   | 5,480,717   |
| Adult Female           | SE50      | 4,920,227     | 5,730,096   | 6,032,540   |
| Adult Male             | SE50      | 4,966,525     | 6,787,451   | 4,972,552   |

Note (PE100, 100bp paired-end reads; SE50, 50bp single-end reads)

**Supplemental Table 2 - Description of Illumina paired-end libraries used in genome assembly.**

| Insert Length | Read Pairs  | Total Mb | Coverage |
|---------------|-------------|----------|----------|
| 185 bp        | 119,416,422 | 23,883   | 34.27    |
| 367 bp        | 42,382,611  | 8,477    | 12.16    |
| 3000 bp       | 24,605,824  | 4,921    | 7.06     |
| 6000 bp       | 65,111,047  | 13,022   | 18.68    |

**Supplemental Table 3 - Moleculo Base-level accuracy**

| Library             | Moleculo 1  | Moleculo 2   | Moleculo 3  |
|---------------------|-------------|--------------|-------------|
| Length              | < 7501 bp   | 7501-9000 bp | > 9000 bp   |
| Aligned Bases       | 542,975,405 | 340,477,235  | 213,340,013 |
| Total Edit Distance | 2,179,239   | 7,247,951    | 7,718,261   |
| Percent Identity    | 99.60%      | 97.90%       | 96.40%      |

**Supplemental Table 4 - Genome Assembly Statistics**

| Parameter                          | ALLPATHS-LG | Metaassembler |
|------------------------------------|-------------|---------------|
| minimum contig size for reporting  | 1,000       | 1,000         |
| number of scaffolds                | 13,151      | 12,259        |
| total scaffold length, with gaps   | 713,608,678 | 697,867,761   |
| N50 scaffold size in kb, with gaps | 947         | 971           |
| N95 scaffold size in kb, with gaps | 8,643       | 9,736         |
| maximum scaffold size              | 6,361,674   | 6,212,894     |

**Supplemental Table 5- Comparison of differential gene expression between bedbug developmental stages.**

| Comparison       | Differentially expressed genes | Upregulated genes | Downregulated genes |
|------------------|--------------------------------|-------------------|---------------------|
| 1__vs__2         | 4386                           | 2467              | 1919                |
| 1__vs__3         | 1983                           | 572               | 1411                |
| 1__vs__4         | 1307                           | 96                | 1211                |
| 1__vs__5         | 627                            | 8                 | 619                 |
| 1__vs__Female    | 2755                           | 742               | 2013                |
| 1__vs__Male      | 791                            | 484               | 307                 |
| 2__vs__3         | 120                            | 91                | 29                  |
| 2__vs__4         | 537                            | 303               | 234                 |
| 2__vs__5         | 2191                           | 1230              | 961                 |
| 2__vs__Female    | 5990                           | 1816              | 4174                |
| 2__vs__Male      | 6242                           | 2715              | 3527                |
| 3__vs__4         | 18                             | 13                | 5                   |
| 3__vs__5         | 588                            | 552               | 36                  |
| 3__vs__Female    | 3192                           | 1358              | 1834                |
| 3__vs__Male      | 3524                           | 2241              | 1283                |
| 4__vs__5         | 421                            | 416               | 5                   |
| 4__vs__Female    | 1908                           | 1034              | 874                 |
| 4__vs__Male      | 2590                           | 2004              | 586                 |
| 5__vs__Female    | 3267                           | 1367              | 1900                |
| 5__vs__Male      | 2435                           | 1777              | 658                 |
| Female__vs__Male | 2886                           | 2067              | 819                 |



**Supplemental Table 6: Repetitive Element Classification**

| Category                   | Number of Elements | Number of BP covered | Percentage of Genome |
|----------------------------|--------------------|----------------------|----------------------|
| <b>SINEs:</b>              | 140178             | 17327911             | 2.5%                 |
| ALUs                       | 0                  | 0                    | 0.0%                 |
| MIRs                       | 1482               | 99463                | 0.0%                 |
| <b>LINEs:</b>              | 331801             | 79880695             | 11.5%                |
| LINE1                      | 103                | 6461                 | 0.0%                 |
| LINE2                      | 9892               | 3429637              | 0.5%                 |
| L3/CR1                     | 6887               | 1707471              | 0.3%                 |
| <b>LTR elements:</b>       | 50201              | 6852704              | 1.0%                 |
| ERVL                       | 8                  | 477                  | 0.0%                 |
| ERVL-MaLRs                 | 5                  | 239                  | 0.0%                 |
| ERV_classI                 | 190                | 32207                | 0.0%                 |
| ERV_classII                | 6                  | 333                  | 0.0%                 |
| <b>DNA elements:</b>       | 104574             | 27677734             | 4.0%                 |
| hAT-Charlie                | 4389               | 1283082              | 0.2%                 |
| TcMar-Tigger               | 904                | 199019               | 0.0%                 |
| <b>Unclassified:</b>       | 373611             | 64684425             | 9.3%                 |
| Total interspersed Repeats | 196423469          | 196423469            | 28.2%                |
| Small RNA:                 | 62012              | 5297714              | 0.8%                 |
| Satellites:                | 1                  | 67                   | 0.0%                 |
| Simple repeats:            | 341954             | 18158644             | 2.6%                 |
| Low complexity:            | 78295              | 5919438              | 0.8%                 |

3

**Supplemental Table 7 - Numbers of Matches of Cimex genes to each microbial genus from TBLASTX**

| Genus       | Number of Matches |
|-------------|-------------------|
| Wolbachia   | 114               |
| Clostridium | 25                |
| Cyanothece  | 24                |

|                    |    |
|--------------------|----|
| Bacillus           | 22 |
| Thermococcus       | 20 |
| Myxococcus         | 20 |
| Sorangium          | 17 |
| Burkholderia       | 15 |
| Pyrococcus         | 14 |
| Oscillatoria       | 14 |
| Pectobacterium     | 13 |
| Spirochaeta        | 12 |
| Pseudomonas        | 12 |
| Legionella         | 12 |
| Geobacter          | 12 |
| Archaeoglobus      | 12 |
| Thermofilum        | 11 |
| Methanobacterium   | 11 |
| Vibrio             | 10 |
| Streptomyces       | 10 |
| Paenibacillus      | 10 |
| Methanocaldococcus | 10 |
| Desulfovibrio      | 10 |
| Aciduliprofundum   | 10 |
| Rhodothermus       | 9  |
| Rhodospirillum     | 9  |
| Nostoc             | 9  |
| Magnetospirillum   | 9  |
| Leptospira         | 9  |
| Dickeya            | 9  |
| Desulfatibacillum  | 9  |
| Caldiilinea        | 9  |
| Synechococcus      | 8  |
| Sulfolobus         | 8  |
| Serratia           | 8  |
| Planctomyces       | 8  |
| Methanopyrus       | 8  |
| Deinococcus        | 8  |
| Anabaena           | 8  |
| Xenorhabdus        | 7  |
| Shewanella         | 7  |
| Rhizobium          | 7  |
| Pleurocapsa        | 7  |
| Photorhabdus       | 7  |
| Opitutus           | 7  |
| Mycobacterium      | 7  |
| Hyphomicrobium     | 7  |

|                    |   |
|--------------------|---|
| Azospirillum       | 7 |
| Trichodesmium      | 6 |
| Stigmatella        | 6 |
| Ralstonia          | 6 |
| Pyrobaculum        | 6 |
| Methanosaeta       | 6 |
| Lactobacillus      | 6 |
| Haliangium         | 6 |
| Enterobacter       | 6 |
| Desulfotomaculum   | 6 |
| Corallococcus      | 6 |
| Calothrix          | 6 |
| Bacteroides        | 6 |
| Agrobacterium      | 6 |
| Thermodesulfatator | 5 |
| Staphylococcus     | 5 |
| Saprosira          | 5 |
| Rubrobacter        | 5 |
| Rivularia          | 5 |
| Providencia        | 5 |
| Pelobacter         | 5 |
| Micavibrio         | 5 |
| Methylobacterium   | 5 |
| Methanotorris      | 5 |
| Methanocella       | 5 |
| Marivirga          | 5 |
| Ignavibacterium    | 5 |
| Hyperthermus       | 5 |
| Herpetosiphon      | 5 |
| Francisella        | 5 |
| Desulfomonile      | 5 |
| Cyanobacterium     | 5 |
| Bdellovibrio       | 5 |
| Bacteriovorax      | 5 |
| Arthrospira        | 5 |
| Anaeromyxobacter   | 5 |
| Alkaliphilus       | 5 |
| Waddlia            | 4 |
| Thermoanaerobacter | 4 |
| Sulfobacillus      | 4 |
| Streptococcus      | 4 |
| Staphylothermus    | 4 |
| Sphaerobacter      | 4 |
| Runella            | 4 |

|                     |   |
|---------------------|---|
| Rhodococcus         | 4 |
| Psychromonas        | 4 |
| Parachlamydia       | 4 |
| Nitrosomonas        | 4 |
| Methanothermus      | 4 |
| Methanothermobacter | 4 |
| Methanosarcina      | 4 |
| Methanococcus       | 4 |
| Metallosphaera      | 4 |
| Mesorhizobium       | 4 |
| Marinomonas         | 4 |
| Marinobacter        | 4 |
| Helicobacter        | 4 |
| Gloeobacter         | 4 |
| Dictyoglomus        | 4 |
| Desulfobacterium    | 4 |
| Cylindrospermum     | 4 |
| Cyclobacterium      | 4 |
| Crinalium           | 4 |
| Chlorobium          | 4 |
| Brevibacillus       | 4 |
| Amycolatopsis       | 4 |
| Acaryochloris       | 4 |
| Zunongwangia        | 3 |
| Zobellia            | 3 |
| Turneriella         | 3 |
| Truepera            | 3 |
| Tistrella           | 3 |
| Thermotoga          | 3 |
| Terriglobus         | 3 |
| Streptosporangium   | 3 |
| Stenotrophomonas    | 3 |
| Stanieria           | 3 |
| Sodalis             | 3 |
| Singulisphaera      | 3 |
| Rickettsia          | 3 |
| Rhodopirellula      | 3 |
| Rahnella            | 3 |
| Pyrolobus           | 3 |
| Pseudoalteromonas   | 3 |
| Proteus             | 3 |
| Pirellula           | 3 |
| Pedobacter          | 3 |
| Parvibaculum        | 3 |

|                       |   |
|-----------------------|---|
| Owenweeksia           | 3 |
| Nitratifactor         | 3 |
| Methylomonas          | 3 |
| Methanoplanus         | 3 |
| Methanomassiliicoccus | 3 |
| Methanolobus          | 3 |
| Methanohalophilus     | 3 |
| Methanohalobium       | 3 |
| Magnetococcus         | 3 |
| Leptolyngbya          | 3 |
| Gluconobacter         | 3 |
| Glaciecola            | 3 |
| Frankia               | 3 |
| Exiguobacterium       | 3 |
| Desulfurococcus       | 3 |
| Desulfosporosinus     | 3 |
| Cytophaga             | 3 |
| Cupriavidus           | 3 |
| Coxiella              | 3 |
| Colwellia             | 3 |
| Chloroflexus          | 3 |
| Chitinophaga          | 3 |
| Chamaesiphon          | 3 |
| Cenarchaeum           | 3 |
| Caldivirga            | 3 |
| Caldisphaera          | 3 |
| Caldisericum          | 3 |
| Caldicellulosiruptor  | 3 |
| Bradyrhizobium        | 3 |
| Blattabacterium       | 3 |
| Actinoplanes          | 3 |
| Achromobacter         | 3 |
| Zymomonas             | 2 |
| Xanthomonas           | 2 |
| Vulcanisaeta          | 2 |
| Tsukamurella          | 2 |
| Treponema             | 2 |
| Thioalkalivibrio      | 2 |
| Thermomicrobium       | 2 |
| Thermobaculum         | 2 |
| Teredinibacter        | 2 |
| Syntrophobacter       | 2 |
| Synergistetes         | 2 |
| Sulfurihydrogenibium  | 2 |

|                    |   |
|--------------------|---|
| Spirosoma          | 2 |
| Sinorhizobium      | 2 |
| Simiduia           | 2 |
| Rothia             | 2 |
| Roseobacter        | 2 |
| Roseburia          | 2 |
| Rhodopseudomonas   | 2 |
| Pseudovibrio       | 2 |
| Propionibacterium  | 2 |
| Porphyromonas      | 2 |
| Polaribacter       | 2 |
| Plautia            | 2 |
| Phycisphaera       | 2 |
| Photobacterium     | 2 |
| Pelotomaculum      | 2 |
| Pelodictyon        | 2 |
| Pantoea            | 2 |
| Paludibacter       | 2 |
| Octadecabacter     | 2 |
| Nitrosopumilus     | 2 |
| Niastella          | 2 |
| Mycoplasma         | 2 |
| Morganella         | 2 |
| Microcystis        | 2 |
| Microcoleus        | 2 |
| Methylocystis      | 2 |
| Methanobrevibacter | 2 |
| Melioribacter      | 2 |
| Marinitoga         | 2 |
| Leptospirillum     | 2 |
| Leifsonia          | 2 |
| Klebsiella         | 2 |
| Kangiella          | 2 |
| Isosphaera         | 2 |
| Ignisphaera        | 2 |
| Ignicoccus         | 2 |
| Hydrogenobacter    | 2 |
| Hirschia           | 2 |
| Herbaspirillum     | 2 |
| Halothermothrix    | 2 |
| Haloterrigena      | 2 |
| Halorhabdus        | 2 |
| Haloferax          | 2 |
| Haliscomenobacter  | 2 |

|                      |   |
|----------------------|---|
| Halanaerobium        | 2 |
| Hahella              | 2 |
| Gramella             | 2 |
| Geobacillus          | 2 |
| Flexibacter          | 2 |
| Fervidicoccus        | 2 |
| Ferroglobus          | 2 |
| Enterococcus         | 2 |
| Emticicia            | 2 |
| Echinicola           | 2 |
| Desulfurivibrio      | 2 |
| Desulfomicrobium     | 2 |
| Desulfohalobium      | 2 |
| Desulfococcus        | 2 |
| Desulfitobacterium   | 2 |
| Dactylococcopsis     | 2 |
| Cronobacter          | 2 |
| Comamonas            | 2 |
| Chroococciopsis      | 2 |
| Chloroherpeton       | 2 |
| Cellulomonas         | 2 |
| Cardinium            | 2 |
| Calditerrivibrio     | 2 |
| Belliella            | 2 |
| Bartonella           | 2 |
| Azoarcus             | 2 |
| Amphibacillus        | 2 |
| Alteromonas          | 2 |
| Alkalilimnicola      | 2 |
| Acidovorax           | 2 |
| Acidithiobacillus    | 2 |
| Acidimicrobidae      | 2 |
| Acidilobus           | 2 |
| Acetohalobium        | 2 |
| Weeksella            | 1 |
| Verrucosispora       | 1 |
| Veillonella          | 1 |
| Variovorax           | 1 |
| Thioflavococcus      | 1 |
| Thiocystis           | 1 |
| Thermosphaera        | 1 |
| Thermosediminibacter | 1 |
| Thermoproteus        | 1 |
| Thermoplasma         | 1 |

|                       |   |
|-----------------------|---|
| Thermomonospora       | 1 |
| Thermogladius         | 1 |
| Thermodesulfovibrio   | 1 |
| Thermocrinis          | 1 |
| Thermoanaerobacterium | 1 |
| Thermincola           | 1 |
| Thermaerobacter       | 1 |
| Thauera               | 1 |
| Tannerella            | 1 |
| Synechocystis         | 1 |
| Symbiobacterium       | 1 |
| Sulfurovum            | 1 |
| Sulfuricurvum         | 1 |
| Strawberry            | 1 |
| Starkeya              | 1 |
| Stackebrandtia        | 1 |
| Spiroplasma           | 1 |
| Sphingomonas          | 1 |
| Solitalea             | 1 |
| Simkania              | 1 |
| Sideroxydans          | 1 |
| Salinispora           | 1 |
| Salinibacter          | 1 |
| Salinarchaeum         | 1 |
| Saccharothrix         | 1 |
| Ruminococcus          | 1 |
| Rubrivivax            | 1 |
| Roseiflexus           | 1 |
| Rhodanobacter         | 1 |
| Ramlibacter           | 1 |
| Psychroflexus         | 1 |
| Pseudonocardia        | 1 |
| Pseudanabaena         | 1 |
| Prosthecochloris      | 1 |
| Prochlorococcus       | 1 |
| Prevotella            | 1 |
| Polynucleobacter      | 1 |
| Phenylobacterium      | 1 |
| Phaeobacter           | 1 |
| Persephonella         | 1 |
| Paracoccus            | 1 |
| Orientia              | 1 |
| Onion                 | 1 |
| Oceanithermus         | 1 |



|                      |   |
|----------------------|---|
| Oceanimonas          | 1 |
| Novosphingobium      | 1 |
| Nonlabens            | 1 |
| Nocardia             | 1 |
| Nitrospira           | 1 |
| Nitrobacter          | 1 |
| Nautilia             | 1 |
| Muricauda            | 1 |
| Moraxella            | 1 |
| Modestobacter        | 1 |
| Methylotenera        | 1 |
| Methylomicrobium     | 1 |
| Methylococcus        | 1 |
| Methylocella         | 1 |
| Methylacidiphilum    | 1 |
| Methanothermococcus  | 1 |
| Methanosphaerula     | 1 |
| Methanosphaera       | 1 |
| Methanosalsum        | 1 |
| Methanoregula        | 1 |
| Methanomethylovorans | 1 |
| Methanoculleus       | 1 |
| Mesoplasma           | 1 |
| Melissococcus        | 1 |
| Meiothermus          | 1 |
| Marinithermus        | 1 |
| Maricaulis           | 1 |
| Maribacter           | 1 |
| Mannheimia           | 1 |
| Mahella              | 1 |
| Macrococcus          | 1 |
| Listeria             | 1 |
| Leptotrichia         | 1 |
| Leptothrix           | 1 |
| Leisingera           | 1 |
| Leadbetterella       | 1 |
| Lactococcus          | 1 |
| Lacinutrix           | 1 |
| Kribbella            | 1 |
| Kitasatospora        | 1 |
| Idiomarina           | 1 |
| Hydrogenobaculum     | 1 |
| Hippea               | 1 |
| Heliobacterium       | 1 |

|                    |   |
|--------------------|---|
| Halovivax          | 1 |
| Halothiobacillus   | 1 |
| Halothece          | 1 |
| Halorubrum         | 1 |
| Haloquadratum      | 1 |
| Halopiger          | 1 |
| Halophilic         | 1 |
| Halogeometricum    | 1 |
| Halobacteroides    | 1 |
| Halalkalicoccus    | 1 |
| Haemophilus        | 1 |
| Granulicella       | 1 |
| Granulibacter      | 1 |
| Gloeocapsa         | 1 |
| Geitlerinema       | 1 |
| Fusobacterium      | 1 |
| Frateuria          | 1 |
| Fluviicola         | 1 |
| Flexistipes        | 1 |
| Flavobacterium     | 1 |
| Flavobacteriaceae  | 1 |
| Fibrella           | 1 |
| Fervidobacterium   | 1 |
| Ferrimonas         | 1 |
| Faecalibacterium   | 1 |
| Eubacterium        | 1 |
| Escherichia        | 1 |
| Elusimicrobium     | 1 |
| Eggerthella        | 1 |
| Edwardsiella       | 1 |
| Dyadobacter        | 1 |
| Desulfurispirillum | 1 |
| Desulfotalea       | 1 |
| Desulfocapsa       | 1 |
| Desulfarculus      | 1 |
| Denitrovibrio      | 1 |
| Delftia            | 1 |
| Dehalogenimonas    | 1 |
| Deferribacter      | 1 |
| Dechloromonas      | 1 |
| Conexibacter       | 1 |
| Comamonadaceae     | 1 |
| Clavibacter        | 1 |
| Citrobacter        | 1 |

|                    |   |
|--------------------|---|
| Chromobacterium    | 1 |
| Chlamydia          | 1 |
| Cellvibrio         | 1 |
| Cellulophaga       | 1 |
| Caulobacter        | 1 |
| Catenulispora      | 1 |
| Carnobacterium     | 1 |
| Carboxydotherrnus  | 1 |
| Candidata          | 1 |
| Butyrivibrio       | 1 |
| Butyrate-producing | 1 |
| Brucella           | 1 |
| Brevundimonas      | 1 |
| Bibersteinia       | 1 |
| Beijerinckia       | 1 |
| Azorhizobium       | 1 |
| Arthrobacter       | 1 |
| Aromatoleum        | 1 |
| Anoxybacillus      | 1 |
| Anaerolinea        | 1 |
| Amycolicococcus    | 1 |
| Ammonifex          | 1 |
| Alcanivorax        | 1 |
| Akkermansia        | 1 |
| Agromonas          | 1 |
| Aggregatibacter    | 1 |
| Aeropyrum          | 1 |
| Aeromonas          | 1 |
| Aequorivita        | 1 |
| Actinosynnema      | 1 |
| Actinobacillus     | 1 |
| Acidotherrnus      | 1 |
| Acidobacterium     | 1 |
| Acidianus          | 1 |
| Acidaminococcus    | 1 |

4

5

**Genes found to be microbial by Alien\_Index**

CLG18395

CLG30550

CLG27621

CLG07002

CLG37794

CLG34355

CLG19415  
CLG20121  
CLG36171  
CLG36804  
CLG22368  
CLG04851  
CLG28628  
CLG31459  
CLG00153  
CLG24980  
CLG36172  
CLG20119  
CLG04852  
CLG27458  
CLG18396  
CLG02682  
CLG25156  
CLG25533  
CLG22534  
CLG02677  
CLG25532  
CLG21625  
CLG37795  
CLG29893  
CLG36170  
CLG02689  
CLG22538  
CLG34352  
CLG24982  
CLG22536  
CLG02678  
CLG04850  
CLG19414  
CLG08570  
CLG01871  
CLG24984  
CLG02684  
CLG29977  
CLG25534  
CLG18444  
CLG13330  
CLG36168  
CLG26542  
CLG30551  
CLG22535

CLG04849  
CLG26064  
CLG22369  
CLG30549  
CLG20117  
CLG13405  
CLG31549  
CLG24157  
CLG29532  
CLG24981  
CLG33576  
CLG17711  
CLG36605  
CLG22370  
CLG18394  
CLG24979  
CLG30232  
CLG29759  
CLG25157  
CLG18393  
CLG24995  
CLG07151  
CLG36806  
CLG22373  
CLG06192  
CLG02688  
CLG08100  
CLG36174  
CLG10509  
CLG00154  
CLG34109  
CLG20118  
CLG22371  
CLG32732  
CLG20122  
CLG18392  
CLG36805  
CLG22537  
CLG02679  
CLG02690  
CLG09293  
CLG34357  
CLG02687  
CLG24996  
CLG22593

CLG34354  
 CLG27186  
 CLG02683  
 CLG02685  
 CLG02676  
 CLG20120  
 CLG02680  
 CLG00156  
 CLG24983  
 CLG34353  
 CLG36176  
 CLG18391  
 CLG22980  
 CLG37793  
 CLG13329  
 CLG27622  
 CLG36175  
 CLG03486

6  
7

**Supplemental Table 8** Three member hydrogen network between residues 96-98-168.

X-ray structures used as templates for homology models highlighted in green.

| PDB code | 96 | 98 | 168 | Network |
|----------|----|----|-----|---------|
| 2FB9     | D  | D  | K   | yes     |
| 2YZG     | D  | D  | K   | yes     |
| 2YZM     | D  | D  | K   | yes     |
| 2YZN     | D  | D  | K   | yes     |
| 2ZDG     | D  | D  | K   | yes     |
| 2ZDH     | D  | D  | K   | yes     |
| 2ZDQ     | D  | D  | K   | yes     |
| 3E5N     | D  | D  | K   | yes     |
| 3I12     | D  | D  | K   | yes     |
| 3LWB     | D  | E  | K   | yes     |
| 3Q1K     | D  | D  | K   | yes     |
| 3R5F     | D  | D  | K   | yes     |
| 3RFC     | D  | D  | K   | yes     |
| 4L1K     | D  | D  | K   | yes     |
| 4ME6     | D  | D  | K   | yes     |
| 1E4E     | D  | S  | K   | yes     |
| 3TQT     | E  | D  | R   | yes     |

|      |   |   |   |     |
|------|---|---|---|-----|
| 1EHI | D | A | K | yes |
| 2I80 | D | L | K | yes |
| 2I87 | D | L | K | yes |
| 2I8C | D | L | K | yes |
| 3N8D | D | L | K | yes |
| 3R5X | D | L | E | no  |
| 4C5A | D | L | E | no  |
| 4C5B | D | L | E | no  |
| 4C5C | D | L | E | no  |
| 4FU0 | D | L | E | no  |
| 110V | D | L | E | no  |
| 110W | D | L | E | no  |
| 2DLN | D | L | E | no  |
| 2PVP | D | L | E | no  |
| 3R23 | D | L | E | no  |

8  
9

**Supplemental Table 9 - Anticoagulants and Bloodmeal-related DEGs**

| Query    | SP | e-value   | Acc      | Definition                                                        |
|----------|----|-----------|----------|-------------------------------------------------------------------|
|          |    |           |          | <b>Apyrase</b>                                                    |
| CLG18094 | +  | 1.00E-99  | CAE46445 | 79 kDa salivary apyrase precursor [Triatoma infestans]            |
|          |    |           |          | <b>Salivary inositol polyphosphate 5-phosphatase</b>              |
| CLG02551 | ++ | 4.00E-62  | AAB08434 | salivary inositol polyphosphate 5-phosphatase [Rhodnius prolixus] |
| CLG36692 | ++ | 1.00E-31  | AAB08434 | salivary inositol polyphosphate 5-phosphatase [Rhodnius prolixus] |
| CLG14908 | ++ | 7.00E-61  | AAB08434 | salivary inositol polyphosphate 5-phosphatase [Rhodnius prolixus] |
| CLG18721 | ++ | 6.00E-60  | AAB08434 | salivary inositol polyphosphate 5-phosphatase [Rhodnius prolixus] |
|          |    |           |          | <b>Infestin</b>                                                   |
| CLG11091 | ++ | 6.00E-09  | AAK57342 | thrombin inhibitor infestin precursor [Triatoma infestans]        |
| CLG11092 | +  | 6.00E-09  | AAK57342 | thrombin inhibitor infestin precursor [Triatoma infestans]        |
| CLG14478 | ++ | 5.00E-20  | AAK57342 | thrombin inhibitor infestin precursor [Triatoma infestans]        |
|          |    |           |          | <b>Serine Proteases</b>                                           |
| CLG29395 | ++ | 0         | BAN20353 | prolylcarboxypeptidase, putative [Riptortus pedestris]            |
| CLG00735 | ++ | 4.00E-174 | EDS34712 | serine protease [Culex quinquefasciatus]                          |
| CLG09902 | +  | 1.00E-13  | EFN87035 | serine protease snake [Harpegnathos saltator]                     |
| CLG34389 | ++ | 7.00E-53  | ETN60567 | serine protease [Anopheles darlingi]                              |
| CLG33858 | ++ | 8.00E-104 | ETN60567 | serine protease [Anopheles darlingi]                              |

|          |    |           |              |                                                                    |
|----------|----|-----------|--------------|--------------------------------------------------------------------|
| CLG20224 | ++ | 4.00E-13  | NP_001155164 | venom protein R precursor [Nasonia vitripennis]                    |
| CLG15203 | ++ | 7.00E-17  | NP_001155164 | venom protein R precursor [Nasonia vitripennis]                    |
|          |    |           |              | <b>Other Salivary</b>                                              |
| CLG20238 | ++ | 2.00E-24  | ABR27888     | putative salivary secreted protein [Triatoma infestans]            |
| CLG20224 | ++ | 3.00E-21  | ABR27888     | putative salivary secreted protein [Triatoma infestans]            |
| CLG15203 | ++ | 1.00E-27  | ABR27888     | putative salivary secreted protein [Triatoma infestans]            |
| CLG32648 | ++ | 1.00E-14  | ABR27836     | salivary secreted protein [Triatoma infestans]                     |
| CLG20227 | ++ | 7.00E-18  | ABR27888     | putative salivary secreted protein [Triatoma infestans]            |
|          |    |           |              | <b>Other Secreted</b>                                              |
| CLG02599 | ++ | 6.00E-10  | ACH56920     | salivary lysozyme [Simulium vittatum]                              |
| CLG19605 | ++ | 2.00E-153 | EAT38110     | lipocalin-1 interacting membrane receptor (limr) [Aedes aegypti]   |
| CLG37461 | ++ | 0         | EAT39655     | metalloprotease m41 ftsh [Aedes aegypti]                           |
| CLG00050 | ++ | 1.00E-138 | EZA62484     | Venom carboxylesterase-6 [Cerapachys biroii]                       |
| CLG24957 | +  | 2.00E-07  | ABG01864     | putative accessory gland protein [Gryllus veletis] (gryllus gland) |
| CLG10344 | ++ | 3.00E-40  | ABR27829     | salivary trypsin [Triatoma infestans]                              |
| CLG21399 | ++ | 4.00E-08  | AAF28384     | lung surfactant protein A [Sus scrofa]                             |
| CLG04610 | +  | 3.00E-09  | EU045345     | 50 kDa midgut protein [Phlebotomus papatasi]                       |

10

---

**Supplemental Table 10 - Trinity transcriptome assembly statistics.**

---

| Parameter                  | Size        |
|----------------------------|-------------|
| N50                        | 3,550       |
| N95                        | 341         |
| Mean contig size (min–max) | 1,596.60    |
| Assembly size (bp)         | 216,321,741 |
| No. of sequences           | 135,489     |

---

11

12

13

14 **Supplementary Methods**

15

16 **Raw sequence data**

17 The genome assembly validated by the National Center for Biotechnology Information (NCBI),  
 18 where it was checked for adaptors, primers, gaps, and low-complexity regions. The genome  
 19 assembly has been approved and given the accession number JRLE00000000 and BioProject



20 PRJNA259363. All genome sequencing data has been deposited in the Sequence Read Archive  
21 (SRA) with accession number SRS749263. RNA-seq data is available as FASTQ files and were  
22 quality-checked and deposited in the SRA with accession SRR1790655.

23

### 24 **Biological samples**

25 The bedbugs were taken from a Harlan strain colony maintained by Louis Sorkin (American  
26 Museum of Natural History). The Har-73 strain was originally collected by Harold Harlan in 1973  
27 from an infestation at the U.S. Army barracks in Fort Dix, NJ, and has been raised as a laboratory  
28 pesticide-susceptible strain since that time.

29

### 30 **Bedbug collection and feeding**

31 Bedbugs were reared in ~236.6 ml (8 fl oz) glass canning jars where the metal covers had a 250-350  
32 µm hole mesh screening heat-glued on the inside. Heat glue was applied to the outer circumference  
33 of the screen surface to leave a 3 cm diameter central circle of exposed screen. Folded cardboard  
34 was used as substrate. Jars were inverted on a human arm for feeding for 30 min on a monthly basis.  
35 Jars were kept in plastic box with an open lid and left at room temperature. Specimens used for  
36 nucleic acids extraction were 1<sup>st</sup> instar nymphs that recently hatched but had not taken any blood  
37 meals (~1 mm in length, pale to white in color).

38

### 39 **DNA & RNA isolation**

40 High molecular weight DNA (>10kb as visualized through agarose gel electrophoresis) was isolated  
41 from ~30 1<sup>st</sup> instar nymphs using the DNeasy Blood & Tissue kit (QIAGEN). Total RNA was  
42 isolated from ~30 individuals for each nymph stage and ~5 individuals for each adult sex. The RNA  
43 extractions were performed using a Trizol / RNeasy (QIAGEN) hybrid protocol, as detailed in [1].

44

45

### 46 **High throughput sequencing library quality check**

47 Moleclo sequences were segregated into 3 bins by length: short (<7,501 bp), medium (7,501-  
48 9,000 bp), and long (>9000 bp). There were 53,5541 short, 30,150 medium, and 6,216 long  
49 sequences. The long reads were used to confirm the insert length of the overlapping fragment  
50 libraries (185 bp insert) by aligning (using BWA [7]) a single lane of the reads to all Moleclo  
51 reads >9000 bp. There were a total of 6,216 such sequences. The insert length of pairs where  
52 both pairs mapped was calculated. A sample of 6,926,206 HiSeq reads were randomly  
53 selected and trimmed using SolexaQA (<http://solexaqa.sourceforge.net>) using a quality  
54 value filter of Q30. Each set of Moleclo sequences was indexed using BWA v0.7.5a  
55 (<http://bio-bwa.sourceforge.net>). Alignments of the filtered HiSeq data to each Moleclo  
56 dataset were performed using the “mem” algorithm of BWA with 30 threads and standard  
57 settings. Alignments were extracted in BAM format using samtools (<http://www.htslib.org>)  
58 with -F set to 4. The ‘MD’ tag was added to the resulting BAM files using the calmd  
59 command of samtools producing SAM files containing this tag. The MD tag allowed for two  
60 pieces of information to be extracted from the alignments: the total number of nucleotides  
61 included in each alignment and the edit distance between the query and reference sequences.  
62 The command used for obtaining the total sequence alignment length was

63

```
64 cat sample_seqs.aln.md.sam | awk '{print $10"\t"$12}' | awk -F: '{print $1"\t"$2"\t"$3}' |  
65 awk '{print length($1)}' | paste -sd+ | bc > sample_seqs.aln.seq_length
```

66

67 Edit distance for each alignment was obtained using the following command:  
68 `grep -o "NM:i:.*\s" sample_seqs.aln.md.sam | awk -F: '{print $3}' | awk '{print $1}' | paste`  
69 `-sd+ | bc &> sample_seqs.aln.tot_distance`

70  
71 The percentage identity between the sequences was obtained by dividing the total edit distance  
72 by the total alignment sequence length and converting the value to a percentage.

73  
74

### 75 **Insert Size Validation**

76 Insert sizes of the DNA paired-read sequencing libraries were validated using an assembly  
77 and alignment strategy. First, reads were trimmed for adapters using SeqPrep  
78 (<https://github.com/jstjohn/SeqPrep>). Adapters were specified as follows: -A  
79 AGATCGGAAGAGCACACGTCTGAACTCCAGTCAC -B  
80 AGATCGGAAGAGCGTCGTGTAGGGAAAGAGTGTA. The remaining reads were then  
81 quality trimmed using SolexaQA using a phred score cutoff of 20 (-h 20) for  
82 DynamicTrim.pl and a minimum trimmed read length of 23 (-l 23) for LengthSort.pl. Reads  
83 were then error trimmed using the ErrorCorrectReads.pl command in ALLPATHS-LG  
84 v44431 (<http://www.broadinstitute.org/software/allpaths-lg/blog>). The parameters used for all  
85 reads were PHRED\_ENCODING=33 and THREADS=10 and the parameter  
86 MAX\_MEMORY\_GB ranged between 20 and 50.

87  
88 The ABySS [8] assembly program was used to assemble the trimmed sequence reads.

89  
90 Alignments of the fragment library were performed to the longest set of Molecule reads using  
91 BWA using default options except for the multiple core option -t 30. The resulting SAM file  
92 was converted into a BAM file using samtools with the view command and -bS option. Insert  
93 sizes were extracted from the resulting BAM file using samtools options view, -F 12 -f 67  
94 and a one-line Perl script:

```
95  
96 perl -lane 'if (abs($F[8])<1000 && abs($F[8])>0){print abs($F[8])}'
```

97  
98 The resulting file of insert sizes were plotted using the Python library matplotlib and  
99 descriptive statistics were generated using the Python library scipy.

100  
101

### 102 **Genome assembly**

103 The genome assembly validated by the National Center for Biotechnology Information (NCBI),  
104 where it was checked for adaptors, primers, gaps, and low-complexity regions.

#### 105 *ABySS*

106 In order to provide accurate insert sizes for the ALLPATHS-LG assembly, an initial ABySS  
107 assembly was generated *de novo*. ABySS 1.5[2] provides the ability to specify paired-end (PE) read  
108 libraries to the assembly without specifying the expected insert size parameters. This allowed for  
109 the use of PE information in the assembly. Assemblies were produced for a range of *k*-mer lengths:  
110 23, 33, 43, 53, and 63. Overlapping PE reads for fragment libraries were aligned to each of the  
111 ABySS assemblies to ensure consistency across *k*-mer values. Insert sizes for reads for which both  
112 pairs mapped were calculated using samtools.

113

## 114 *ALLPATHS-LG*

115 The genome assembly was performed using ALLPATHS-LG R44837  
116 (<http://www.broadinstitute.org/software/allpaths-lg/blog>). The assembly used default settings with  
117 the exception of the minimum contig size being set to 200bp (MIN\_CONTIG=200) and 20 threads  
118 (THREADS=20) when running the RunAllPathsLG command. Four sequencing libraries were  
119 provided for the assembly: a fragment library with a mean insert size of 160 bp and SD=20 bp, a  
120 jumping library with a mean insert size of 600bp and SD=150 bp, a jumping library with a mean  
121 insert size of 2,100 bp and SD=500 bp, and a jumping library with a mean insert size of 3,700 bp  
122 and SD=500 bp.

123

## 124 *Molecuro*

125 A total of 571,913 Molecuro reads were generated, ranging in size from 1500 to 18,740 bp  
126 (mean=3,481±1,923 bp), representing a total of ~4× coverage of the genome (1.99 Gb total  
127 sequence production). The reads were assembled using the Celera Assembler v8.0 ([http://wgs-  
128 assembler.sourceforge.net](http://wgs-<br/>128 assembler.sourceforge.net)) with the bogart unitig algorithmic implementation [3]. Note that this  
129 version of the assembler has been enhanced to support reads as long as 32 kb so to accommodate  
130 Molecuro and other long-read sequencing technologies. All other parameters were set to their  
131 recommended values. In light of the low coverage, the assembler created 59,785 contigs spanning  
132 473,254,128 bp with an N50 size of 10,674 bp (max=193,467 bp). Because no mate-pairs were used  
133 in the assembly, no scaffolds were available from these data.

134

## 135 *Metassembler*

136 The ALLPATHS and Molecuro assemblies were combined into a single assembly using  
137 Metassembler 1.1 [4] with the following parameters: bowtie2\_threads=24, bowtie2\_maxins=2424,  
138 bowtie2\_minins=5024, mateAn\_A=3074, mateAn\_B=4374. The ALLPATHS assembly was set as  
139 the primary assembly with the Molecuro assembly being secondary. In order to keep ALLPATHS  
140 scaffolds which do not have alignments in the Molecuro assembly, the following parameters were  
141 used meta2fasta\_do=1, meta2fasta\_keepFlag=0, meta2fasta\_sizeFilterP=200. This approach was  
142 taken due to the large amount of missing sequence in the Molecuro assembly.

143

## 144 **BioNano genome mapping**

### 145 *High-molecular weight DNA extraction*

146 High-molecular weight (HMW) DNA extraction was performed based on the protocols from Zhang  
147 et al. (2011). Bedbug embryos were rinsed in 0.7% NaCl and then soaked in 50% bleach. After  
148 being rinsed again, they were washed with Mosquito Buffer (MB) (100 mM NaCl, 200 mM  
149 sucrose, 10 mM EDTA (pH 9.4), and 7.5 μL BME) and diced with a razor blade until pulp. They  
150 were ground gently with a pestle in a microcentrifuge tube and then allowed to settle for 2 min. The  
151 supernatant was transferred to a new tube. Two hundred μL of MB was added to the remaining  
152 insoluble material and grinding was repeated, followed by settling and removing the supernatant  
153 and combining it with the first supernatant. This was repeated until the supernatant was clear (~3  
154 additional times). The whole supernatant was passed through a 40-μM filter and then centrifuged  
155 for 5 minutes at 4000 × g. The supernatant was discarded and the pellet was washed with PBS 2×.  
156 The pellet was finally resuspended in 40 μL of cell resuspension buffer and gel plugs were made as  
157 recommended for the CHEF Mammalian Genomic DNA Plug Kit (BioRad cat. No. 170-3591).  
158 Plugs were incubated with lysis buffer and proteinase K for 4 h at 50°C. After a wash, 2.5mL  
159 RNase Buffer (10mM Tris (pH 7.5) and 15mM NaCl) were added, followed by addition of 50 μL  
160 RNaseA (QIAGEN). The plugs were washed and then solubilized with GELase (Epicentre). The

161 purified DNA was subjected to 4 h of drop dialysis (Millipore cat. No. VCWP04700) and quantified  
162 on a Nanodrop 1000 spectrophotometer (Thermo Scientific) and/or the Quant-iT dsDNA Assay Kit  
163 (Molecular Probes, Life Technologies).

164

#### 165 *DNA labeling*

166 DNA was labeled according to commercial protocols using the IrysPrep Reagent Kit (BioNano  
167 Genomics, Inc). Specifically, 300 ng of purified genomic DNA was nicked with 4 U of nicking  
168 endonuclease Nt.BspQI and 3 U of Nt.BbvCI or Nb.BbvCI (New England BioLabs) at 37°C for 2 h  
169 in NEB Buffer 3. The nicked DNA was labeled with a fluorescent-dUTP nucleotide analog using  
170 Taq polymerase (New England BioLabs) for 1 h at 72°C. After labeling, the nicks were ligated with  
171 Taq ligase (New England BioLabs) in the presence of dNTPs. The backbone of fluorescently  
172 labeled DNA was stained with YOYO-1 Iodide (Molecular Probes, Life Technologies).

173

#### 174 *Data collection*

175 The DNA was loaded onto the nanochannel array of BioNano Genomics IrysChip using  
176 electrophoresis. Linearized DNA molecules were then imaged and repeated cycles of DNA loading  
177 and imaging using the BioNano Genomics Irys system was performed. The DNA molecule  
178 backbones (YOYO-1 stained) and locations of fluorescent labels along each molecule were detected  
179 using the software package IrysView (<http://www.bionanogenomics.com/products/irysview>). The  
180 label locations of each DNA molecule were reported to produce an individual single-molecule map.

181

#### 182 *Single-molecule alignment against sequence assembly*

183 In-silico maps were generated based on the sequence assembly scaffold for alignment against  
184 single-molecule maps. Single-molecule maps were aligned to the in-silico maps using software  
185 tools developed at BioNano Genomics. Alignments were obtained using a dynamic programming  
186 approach maximizing the scoring function that represented the likelihood of a pair of intervals being  
187 similar (Anantharaman TS, 2001). The likelihood scores were calculated based on a noise model  
188 which took into account fixed sizing error, sizing error which scales linearly with the interval size,  
189 misaligned sites (false positives and false negatives), and optical resolution. An alignment *P*-value  
190 threshold of 1e-9 was used to minimize false positive alignments.

191

#### 192 **Transcriptome assembly**

193 The bedbug transcriptome was produced using the Trinity assembler r2012-10-05 [7]. In order to  
194 reduce the amount of redundant information fed to Trinity, duplicate sequences among the  
195 631,227,170 50-bp single-end reads were removed using the fastq-mcf program from the ea-utils  
196 library. This was achieved using the command line options -0 -D 50 n/a. Prior to assembly, the  
197 adapter sequencers were trimmed from all reads using SeqPrep v1.0 [8] with the following  
198 parameters: -A AGATCGGAAGAGCACACGTCTGAACTCCAGTCAC -B  
199 AGATCGGAAGAGCGTCGTGTAGGGAAAGAGTGTA. Basecall quality trimming was then  
200 performed using SolexaQA [9] with a phred score cutoff of 20 (-h 20) in DynamicTrim.pl and a  
201 minimum trimmed read length of 23 (-l 23) in LengthSort.pl. Trinity was run with the following  
202 parameters: --seqType fq --JM 200G --CPU 32. The assembly statistics are shown in **Table S9**.

203

#### 204 **CEGMA and Sequence Data Validation**

205 CEGMA v2.4.010312 [10] as used to check for the existence of core eukaryotic genes (CEGs) in  
206 both the genome and transcriptome assemblies. Default parameters were used for the genome  
207 assembly, while --max\_intron 0 was used for the transcriptome assembly. In order to assess the

208 validity of the final assembly, the CEGMA (Core Eukaryotic Genes Mapping Approach) [20] was  
209 used to establish our coverage of core eukaryotic genes (CEGs). Out of 248 CEGs, the ALLPATHS  
210 assembly included 218 completely assembled genes, with an additional 21 CEGs partially  
211 assembled, giving us an estimated gene completeness of 96% (239/248). We also had the genome  
212 assembly validated by the National Center for Biotechnology Information (NCBI), where it was  
213 checked for adaptors, primers, and low-complexity regions. The genome assembly has been  
214 approved and given the accession number JRLE00000000 and Bioproject PRJNA259363, and all  
215 the RNA-sequencing data has been deposited in the Sequence Read Archive (SRA, ID:264998).

216

### 217 **MAKER annotation**

218 Annotation was performed using MAKER v2.28 [11] following a two-pass workflow  
219 (<https://github.com/sujaikumar/assemblage/blob/master/README-annotation.md>). The workflow  
220 can be summarized as follows. First, CEGMA was run on the Metassembler-produced assembly.  
221 The CEGMA results were used for training a SNAP v2006-07-28 [12] hidden Markov model  
222 (HMM). Specifically, the cegma2zff program was run on the output cegma gff file. The fathom  
223 program was run with the genome.ann and genome.dna files produced by cegma2zff and a -  
224 categorize value of 1000. Fathom was run a second time with an -export value of 1000 and -plus  
225 inputs of uni.ann and uni.dna from the previous fathom step. The resulting export.ann and  
226 export.dna files were used as import to the forge program. The CEGMA/SNAP HMM was  
227 produced with the hmm-assembler.pl program. Next, a second HMM was produced using  
228 GeneMark-ES v2.3e [13,14] with default settings. In order to provide protein evidence for the  
229 MAKER annotation, we retrieved all protein sequences from the only other insofar published and  
230 publicly released hemipteran insect genome sequence (pea aphid *Acyrtosiphon pisum* assembly  
231 v2.1b  
232 [https://www.aphidbase.com/aphidbase/content/download/3347/34150/file/aphidbase\\_2.1b\\_pep.fasta](https://www.aphidbase.com/aphidbase/content/download/3347/34150/file/aphidbase_2.1b_pep.fasta.bz2)  
233 [.bz2](https://www.aphidbase.com/aphidbase/content/download/3347/34150/file/aphidbase_2.1b_pep.fasta.bz2)) [15]. The maker\_opts.ctl file was edited to include the Metassembler genome assembly for the  
234 genome entry, the Trinity assembly for the est entry, the *Acyrtosiphon pisum* protein sequences for  
235 the protein entry, the CEGMA/SNAP HMM file for the snaphmm entry, the GeneMark-ES HMM  
236 file for the gmhmm entry, est2genome set to 1, protein2genome set to 1, keep\_preds set to 1, and  
237 single\_exon set to 1. The first iteration of MAKER was run with these configuration values. The  
238 MAKER program gff3\_merge was used to merge together the resulting gff3 files from MAKER.  
239 This merged gff3 file was used as input to SNAP to build a second HMM using the SNAP HMM  
240 creation process as described previously. The genome.ann zff file created as part of the SNAP  
241 HMM creation process was used to generate a gff3 file using the zff2gff3 program included in the  
242 SNAP distribution. The Perl one-liner perl -plne 's/\t(S+)\\$/\t\t\$1/' was used to add an extra  
243 column to the generated gff3 file for input to Augustus. An altered version of the autoAug.pl script  
244 from Augustus v2.7 [16] was used to generate an Augustus HMM which used a GMAP v2014-02-  
245 28 [17] alignment as a replacement for the BLAT [18] alignment used in the autoAug.pl pipeline.  
246 The parameters used for autoAug.pl were the genome assembly for the --genome argument, the  
247 transcript assembly for the --cdna argument, the gff3 file produced by SNAP for the --trainingset  
248 argument, --singleCPU, -v, and --useexisting. The GMAP alignment was generated by first running  
249 gmap\_build on the genome assembly. The gmap command was then used to align the cdna.fa  
250 sequences (generated by autoAug.pl) to the indexed genome with the following parameters based  
251 on the BLAT alignment parameters from autoAug.pl: --min-identity=0.8 -B 5 --nthreads=10 --  
252 intronlength=100000 --format=psl. A second iteration of MAKER was run with the same  
253 parameters as described before with the following changes: the Augustus gene species model  
254 produced by autoAug.pl for the augustus\_species entry, the second SNAP HMM was used for the



255 snaphmm parameter, est2genome set to 0, protein2genome set to 0, pred\_stats set to 1, min\_protein  
256 set to 30, alt\_splice set to 1, split\_hit set to 4000, single\_length set to 250, and evaluate set to 1. The  
257 resulting gff3 files were merged using gff3\_merge. Finally, the merged gff3 file was filtered by  
258 removing mRNAs along with their associated child features with an AED score <1 using Perl in-  
259 house developed scripts, grep, and fgrep.pl  
260 (<https://github.com/sujaikumar/assemblage/blob/master/fgrep.pl>). The resulting gff3 file was  
261 analyzed using a custom Python script making use of gffutils (<http://pythonhosted.org/gffutils>),  
262 numpy [19], and matplotlib [20] libraries to extract the relevant annotation information.

263

### 264 **Gene model sequence extraction**

265 Gene model sequences were extracted using the scaffold fasta file generated by Metassembler and  
266 the gff3 file generated by MAKER as input to the bedtools v2-2.19.1 [21] program getfasta.

267

### 268 **Assembly contamination investigation**

269 The Trinity transcriptome assembly was aligned to human reference genome version hg19 using the  
270 STAR v2.3.1z aligner [22]. In order to accommodate the longer lengths of the transcript sequences  
271 (compared to RNA sequencing read lengths), STAR was compiled with the STARlong option.  
272 STAR was run using the following parameters: --outFilterMismatchNmax 100 --seedSearchLmax  
273 30 --seedSearchStartLmax 30 --seedPerReadNmax 100000 --seedPerWindowNmax 100 --  
274 alignTranscriptsPerReadNmax 100000 --alignTranscriptsPerWindowNmax 10000. Mapped reads  
275 were filtered from the resulting SAM file using samtools with the -F 4 option. The alignment  
276 length, as well as the total edit distance as reported by the “NM” tag of the remaining alignments  
277 were extracted from the SAM file using awk. This information was used to calculate the percentage  
278 identity of the aligned sequence. The meta-assembly of the genome was aligned to a local copy of  
279 the RefSeq [23] human\_genomic database (downloaded on May 7, 2014) using BLASTN 2.2.28+  
280 [24] with the following parameters: -outfmt 6 -num\_threads 20 -max\_target\_seqs 10 -evalue 0.001.  
281 The awk program was used to filter the BLASTN results by alignment length and percent identity.  
282 After submitting the Metassembler-based genome assembly to NCBI, a contamination screen  
283 identified regions of the scaffolds that were flagged as contaminated due to the presence of  
284 sequences of known primers or other organisms. These sequences were removed and the containing  
285 scaffolds were split. The identifier code of the scaffold was retained and a segment identifier was  
286 created based on the number of sequences resulting from the contamination removal. New identifier  
287 codes were created by appending segment identifiers to the original scaffold identifier code  
288 separated by a period (.).

289

### 290 **Gene expression analysis**

291 Single-end 50 bp Illumina reads from each developmental stage (1<sup>st</sup>, 2<sup>nd</sup>, 3<sup>rd</sup>, 4<sup>th</sup>, and 5<sup>th</sup> instar  
292 nymphs) and adult (male and female) were aligned to the meta-assembly of the genome. First, the  
293 genome was indexed using the genomeGenerate mode of the STAR aligner using the following  
294 parameters: --runThreadN 20 --sjdbGTFfile bedbug.v1.gff --sjdbGTFtagExonParentTranscript  
295 Parent --sjdbOverhang 99, where the gff file was generated by the two-pass MAKER annotation  
296 described previously. In order to avoid having gene model names truncated when mapping RNA-  
297 seq reads to the genome, the names were shortened to provide a unique, short name for each gene.  
298 Each set of RNA-seq reads from the developmental stages and adult sex groups were aligned to the  
299 indexed genome sequence using STAR with the following parameters: --readFilesCommand zcat --  
300 runThreadN 20 --outReadsUnmapped Fastx. STAR produced alignments in SAM format for each  
301 set of RNA-seq data. Each of these SAM files was converted to a BAM file using samtools using

302 the view command with parameters -Sb. Each BAM file was then sorted using the samtools sort  
303 command. In order to perform pairwise differential expression analysis for each RNA-seq dataset,  
304 the MAKER-generated gff file and BAM files were uploaded to the Ratsch Lab Galaxy [25] server  
305 (<https://galaxy.cbio.mskcc.org>). Pairwise differential expression analysis was performed using the  
306 DESeq2 v1.0.19 [26] Galaxy wrapper which is integrated into the Ratsch Lab’s Online Quantitative  
307 Transcriptome Analysis (Oqtans) tool suite (<http://oqtans.org>). Each RNA-seq group (instars and  
308 sex) was submitted as a replicate group with each replicate being submitted individually. For the  
309 Select fitting to the mean intensity parameter, the mean option was chosen. The job was submitted  
310 resulting in a tab-delimited file of DEG models. DEGs were filtered using an absolute fold-change  
311 cutoff of  $\geq 1.5$  and a Benjamini-Hochberg adjusted *P*-value of  $\leq 0.05$  to produce a set of DEGs for  
312 each pairwise comparison.

313

### 314 **Functional annotation**

315 We performed functional annotation of bedbug sequences based on the gene ontology (GO)  
316 vocabulary using the Blast2GO v2.5.0 pipeline (<https://www.blast2go.com>) with the following  
317 parameters: java -Xmx50G -cp \*:ext/\*: es.blast2go.prog.B2GAnnotPipe -in  
318 bedbug.allBBgeneMatches.txt -out bedbug\_out\_50G.annot -prop b2gPipe.properties.local –annot,  
319 where b2gPipe.properties.local points to a local Blast2GO database. We also used InterProScan  
320 v5.5-48.0 [27] with the following parameters: -dp -f TSV,XML,GFF3 -goterms -iprlookup -i  
321 Cimex\_lectularius.

322

### 323 **Human contamination of RNA-seq data**

324 Unaligned reads retained when producing previously described RNA-seq alignments to the  
325 Metassembler genome assembly were aligned to human genome hg19 using STAR. The samtools  
326 view command was used to count aligned reads with the -S -c -F 4 options.

327

### 328 **Active gene discovery**

329 Sorted bam files for each developmental stage and sex as described previously were used as input to  
330 the rpkmforgenes.py program [28]. Each replicate bam file was processed separately. The resulting  
331 RPKM values were filtered at three different RPKM thresholds: 0.1, 1, and 10. A gene model is  
332 only considered active in the case that RPKM values for all three replicates surpassed the threshold.  
333 The counts for genes considered active were plotted using Python’s matplotlib.

334

### 335 **Analysis of genes related to blood-feeding activity**

336 Several suites amino-acid sequences from anticoagulants and other bioactive proteins involved  
337 blood feeding known from other sanguivorous taxa were prepared as target databases for blastp  
338 searches using unannotated predicted gene products from the combined Qmolecula/allpaths hybrid  
339 assembly. Those targeted were anti-thrombins, factor Xa inhibitors, platelet aggregation and  
340 activation inhibitors, hyaluronidases and plasminogen activators. In addition, the full set of  
341 predicted gene products was compared both to ToxProt, a compilation of all toxin proteins produced  
342 by venomous animals, as well as a third query database comprising all salivary protein sequences  
343 already annotated for Cimicomorpha at NCBI. The latter consists primarily of those sequences  
344 available for the salivome of *Tratima infestans*. High-scoring matches (e-value  $< -60$ ) then were  
345 sorted and evaluated for relevance to salivary and blood-feeding related functionality. Premised on  
346 the notion that to be biologically active in the context of sanguivory activity, and that they would be  
347 expected to be targeted to the extracellular environment, amino acid sequences were subject to  
348 prediction of N-terminal signal peptide regions (D-cutoff = 0.50) leveraging artificial neural

349 network systems through SignalP 4.1 at <http://www.cbs.dtu.dk/services/SignalP/>. Predicted gene  
350 products were then compiled and compared with BLASTP against the full suite of available  
351 annotated sequences (NR in GenBank) to determine whether another non-target functionality was a  
352 better match; if a better e-value was found these were removed.

353  
354 We mined the set of bedbug protein sequences via BLASTP by using as queries a multitude of  
355 proteins from other species known to confer partial or full resistance to insecticidal compounds,  
356 when (1) containing one or more amino acid replacements, (2) their genes are duplicated, or (3)  
357 their genes are associated with transposable elements. The bedbug hits were queried themselves  
358 against the UniProt protein knowledgebase (<http://www.uniprot.org>) using BLASTP, and the results  
359 were manually inspected for similarity to candidates of known function.

### 360 **Bacterial genetic traces**

361 We downloaded all of the complete bacterial genomes that were listed in Ensembl release 24  
362 (<ftp://ftp.ensemblgenomes.org/pub/release-24/bacteria/fasta>). In total, this sample included 20,030  
363 bacterial strains. We ran reciprocal TBLASTX searches between the bacterial genomes and both the  
364 *C. lectularius* gene set and the full genome sequence using a cutoff E-value of <1e-5 and required a  
365 30 bp overlap match. For the SNP calling, we ran MUMmer [29] to compare the gene calls from the  
366 bedbug genome against the reference *C. lectularius* *Wolbachia* endosymbiont (wCle) genome [30].  
367  
368

### 369 **Protein modeling**

370 Protein structural modeling was carried out with SWISS-MODEL (<http://swissmodel.expasy.org>)  
371 producing a high quality structure with a model-template C- $\alpha$  root mean square deviation of 2.3 Å.  
372 The models were further refined with Molecular Dynamics (MD) simulations with the Amber14  
373 molecular dynamics suite [31]. The proteins and ATP molecules were placed in a water box, and  
374 after initial minimization and equilibration for 1 ns, the production run with the canonical (NVT)  
375 ensemble and Langevin thermostat heat exchange totaling 100 ns was conducted on a high-  
376 performance Linux cluster with NVIDIA Tesla GPU nodes. MD trajectory files were collected and  
377 an average structure over all 100-ns time frames was calculated for each model with the VMD  
378 program [32] and followed by a brief minimization. Post MD simulation analysis and visual  
379 representations were conducted in MOE program [33].  
380

381 All available 39 X-ray crystal structures of DDL proteins were downloaded from the Protein Data  
382 Bank (<http://www.rcsb.org>). After aligning protein sequences we searched for the residues that  
383 were located in the same positions as in the reported network, and indeed found substantial  
384 supporting evidence for such network occurrence. Among these 39 structures, 24 of them have  
385 lysine in the position similar to K168 of *Wolbachia*. Aspartic acid in position 96 is conserved  
386 among 38 available crystal structures. There are some variations in position 98, where we also  
387 observed a mutation A98T. Aspartic acid is the most common amino acid in this position (occurred  
388 15 times), followed by leucine (also 15 times). There is no available crystal structure of DDL with  
389 threonine in position 98 (**Table S8**). Interestingly, three member networks similar to the D96-T98-  
390 K168 hydrogen-bonding network observed after MD simulations in the K168 mutant form of  
391 *Wolbachia* were present in all D96-D98-K168 and D96-L98-K168 X-ray crystal structures.  
392 However, if K168 is replaced with E, as happens in 10 crystal structures, then such network is not  
393 observed. It is especially evident for sequences where position 98 is occupied by amino acids with  
394 aliphatic side chains, e.g. leucine. We found it very intriguing that such hydrogen bond network  
395 occurred only in the mutant protein despite the fact that our template structures, IIOV and 4C5B,



396 lack this network. As we mentioned in the manuscript, the replacement of alanine with the larger  
397 threonine sidechain which can serve as a hydrogen bond donor, may help the formation of this three  
398 member network T98-D96-K168 and facilitate the shift of T98 toward K168 in the mutant protein  
399 that resulted in 95-98 strand shift and create more space for ATP binding in the mutant DDL vs  
400 wild type A98 DDL.

401  
402 Based on the computational model we concluded that among eight observed mutations, A58D,  
403 I60V, T84R, I93V, A98T, L104F, G108D, I109V, none was directly involved into the binding of  
404 ATP. However it is worth noting that, in the wild-type protein, the residues in positions 58, 60 and  
405 84 are in close proximity and form a hydrogen-bonding network that stabilizes loops formation in  
406 this region. It was expected that a change from a small neutral residue to a larger charged residue  
407 (e.g. A58D, T84R) might cause reorganization of the loops. The comparison of the wild type and  
408 mutant DDL models suggests that a replacement to oppositely charged amino acids may lead to  
409 stronger interactions within this network. In addition to hydrogen bonds, strong ionic interactions  
410 occur between D58 and R84 in the mutant protein. This in turn leads to partial changes in adjacent  
411 flexible regions as seen in **Supplementary Figure 10** and may cause some alteration in ligase  
412 activity.

#### 413 414 **Evolutionary relationships**

415 We established 1:1 orthology relationships with another 19 arthropod fully sequenced genomes  
416 using a combination of sequence similarity and clustering procedures as well as phylogenetic  
417 criteria as implemented in the OrthologID pipeline[34,35]. We then analyzed all orthologs in a  
418 phylogenetic framework in two ways. We constructed a gene content framework for bedbug in  
419 the context of 20 other fully sequenced arthropod genomes by combining orthologous loci  
420 according to their presence (character coded as 1) or absence (character coded as 0). We  
421 analyzed this presence-absence matrix using our Venninator program[36,37]. The gene content  
422 phylogenetic matrix was analyzed using equally weighted and Dollo parsimony in PAUP\*  
423 4.0b10 (<http://paup.csit.fsu.edu>), as well as with maximum likelihood (ML) phylogenetic  
424 inference using the BINGAMMA model in the POSIX-threads build of RAxML v8[38]. The  
425 protein supermatrix was analyzed using maximum likelihood in RAxML with a general time-  
426 reversible (GTR) substitution matrix estimated from our arthropod proteomic sequences. We  
427 contrasted the fit of our data-derived GTR substitution model to the commonly used WAG  
428 model [39]. The empirical residue frequencies were used and the among-site rate heterogeneity  
429 was modeled using the  $\Gamma$  distribution and four discrete rate categories [40]. Node robustness  
430 was assessed via bootstrap resampling [41].

431  
432 *The ddl* sequences from all *Wolbachia* genomes from insects were downloaded from NCBI  
433 GenBank and aligned by respecting the protein-coding frame using TranslatorX [42]. The final  
434 alignment of 14 sequences was trimmed to match the length of the bedbug *ddl* sequence (951 bp,  
435 317 aa). The *Brugia malayi* (nematode) *Wolbachia* was set as outgroup. Phylogenetic tree inference  
436 was carried out using both Maximum Parsimony (MP) and ML in PAUP and RAxML. ML  
437 inference was run using the general time-reversible (GTR) nucleotide substitution model and the  $\Gamma$   
438 distribution and four discrete rate categories. The ML and MP trees were identical with very similar  
439 bootstrap node support values. We analyzed codon by codon selection by contrasting the rates of  
440 fixation of nonsynonymous (dN) vs. synonymous (dS) substitutions in Datamonkey  
441 (<http://www.datamonkey.org>) using various models: MEME (mixed effects model evolution) which  
442 can identify codons undergoing episodic or pervasive selection, FEL (fixed effects likelihood) that

443 directly estimates dN and dS at each codon and SLAC (single ancestor likelihood counting), which  
444 is the most conservative method contrasting dN and dS rates, and FUBAR (Fast Unconstrained  
445 Bayesian AppRoximation), a robust method that can detect codons experiencing positive and  
446 purifying selection. Furthermore, we examined the potential for diversifying selection to have acted  
447 on internal branches of the *ddl* genealogy using the branch-site model implemented in BSREL  
448 (branch-site random effects likelihood). In all cases the ML gene tree was used as guide tree.

449

### 450 **Signal peptide detection**

451 We used the program SignalP v4.0[43] [ref] to identify evidence of signal peptides in the proteins.  
452 Strong evidence of a signal peptide sequence was considered a D-score exceeding the dynamically  
453 determined threshold value (typically 0.45 or 0.5).

454

### 455 **Metagenomic sampling**

456 The metagenomic samples were obtained from the PathoMap project (<http://www.pathomap.org>)  
457 [44] and the reads from 1,447 sampled New York City subway locations were aligned against the *C.*  
458 *lectularius* genome sequence using BWA[45]. Variants were called using freebayes [46] and  
459 manipulated using PLINK[47] in order to produce a subset with calls for 90% of the locations. We  
460 then constructed a phylogenetic tree using MP and a heuristic search with TBR (tree bisection-  
461 reconnection) branch swapping and 100 random additions as starting points in PAUP. A retention  
462 index (RI) was calculated for the given the phylogeny. One-tailed randomization tests for each  
463 variable tested whether or not the actual RI was significantly greater than the RIs of randomized  
464 data. Randomized RI data were calculated by randomizing the characters ascribed to terminals for  
465 each variable and then determining their RI given the SNP phylogeny (9,999 replicates).  
466 Randomization tests were conducted using R with the packages APE [48] and phangorn[49].

467

468 We mapped the resulting phylogenetic trees on a two-dimensional geographical map using  
469 the GPS coordinates of the sampled subway locations. The tree files and latitude-longitude  
470 coordinates were converted to .kml format files with the GeoPhylo Engine[50], and were examined  
471 in Google Earth (<https://www.google.com/earth>).

472

### 473 **Anticoagulant Gene Analysis**

474 We gathered a collection of anticoagulants from a wide range of species and using BLAST ad  
475 compared them to the bedbug proteome. High-scoring matches (D-score <0.50) for predicted gene  
476 products with complete signal peptide secretory sequences were found for the serine protease  
477 inhibitor infestin, the antihemostatic (anti-platelet aggregation factor) apyrase, and the vasodilator  
478 or anti-histamine lipocalin, all three of which are the result of adaptations to blood feeding. More  
479 specifically, infestin is a Kazal-type thrombin inhibitor (binding in a slow, tight-binding,  
480 competitive process) that is utilized as a structural scaffold template for exogenous anticoagulants  
481 [51]. Infestin is found in the kissing bug *Triatoma infestans*. Apyrase, which may promote the  
482 formation of hematomas, is a salivary enzyme (ATP-diphosphohydrolase) that hydrolyzes ATP and  
483 ADP to AMP and orthophosphate, thus preventing the effect of ADP on hemostasis (ADP is an  
484 important stimuli for platelet aggregation in vertebrates) [52]. The thrombin and intrinsic tenase  
485 complex (ITC) inhibitor lipocalin has a characteristic eight-stranded anti-parallel  $\beta$ -barrel structure  
486 that the kissing bug *Triatoma pallidipennis* uses as a scaffold for anticoagulants [53]. Lipocalin is  
487 also found in the kissing bug *Rhodnius prolixus*. We also found for a variety of characterized  
488 proteins with less obvious associations to a blood feeding lifestyle. Venom metalloproteases are  
489 most intensively studied in the context of crotaline and viperine snake envenomations wherein their

490 hemorrhagic activity relates to endothelial pathology, fibrinogenolysis and their ability to act as  
491 disintegrins that inhibit platelet aggregation [54]. Zinc-binding metalloproteases are present in the  
492 salivomic profiles of a wide range of arthropod sanguivores, including ticks [55], hookworms [56]  
493 and cimicomorphs related to bedbugs; e.g., the reduviids [57]. Serine protease inhibitors are more  
494 commonly associated with a blood feeding habit than are serine proteases [58]. Nonetheless, a  
495 variety of these proteases and other trypsin-like plasminogen activators have been characterized  
496 from the salivary transcriptomic profiles of the relatively closely related *Triatoma matogrossensis*  
497 and *Triatoma infestans* [59]. These references were all used for the comparison to the bedbug  
498 proteome and genome.  
499

500 The raw sequences used to generate the tree were:

501 gi|115392217|gb|ABI96910.1| brasiliensin precursor [*Triatoma brasiliensis*]  
502 gi|118137638|pdb|2ERW|A Chain A, Crystal Structure Of Infestin 4, A Factor Xiiia Inhibitor  
503 gi|14211145|gb|AAK57342.1| thrombin inhibitor infestin precursor, partial [*Triatoma infestans*]  
504 gi|14211145|gb|AAK57342.1| thrombin inhibitor infestin4 precursor, partial [*Triatoma infestans*]  
505 gi|167871104|gb|EDS34487.1| serine protease inhibitor dipetalogastin [*Culex quinquefasciatus*]  
506 gi|170049257|ref|XP\_001855099.1| serine protease inhibitor dipetalogastin [*Culex*  
507 *quinquefasciatus*]  
508 gi|193683435|ref|XP\_001945453.1| PREDICTED: serine protease inhibitor dipetalogastin  
509 [*Acyrtosiphon pisum*]  
510 gi|307180124|gb|EFN68168.1| Serine protease inhibitor dipetalogastin [*Camponotus floridanus*]  
511 gi|332019031|gb|EGI59565.1| Serine protease inhibitor dipetalogastin [*Acromyrmex echinatior*]  
512 gi|357614659|gb|EHJ69197.1| putative serine protease inhibitor dipetalogastin precursor [*Danaus*  
513 *plexippus*]  
514 gi|4033530|emb|CAA10384.1| dipetalogastin [*Dipetalogaster maximus*]  
515 gi|405975560|gb|EKC40118.1| Serine protease inhibitor dipetalogastin [*Crassostrea gigas*]  
516 gi|485220029|gb|JAA76439.1| putative 3-kazal and poly his protein similar to brasiliensin precursor  
517 [*Rhodnius prolixus*]  
518 gi|485221363|gb|JAA77097.1| putative multi kazal and poly-his protein similar to brasiliensin,  
519 partial [*Rhodnius prolixus*]  
520 gi|485221649|gb|JAA77239.1| putative similar to brasiliensin precursor, partial [*Rhodnius prolixus*]  
521 gi|512898569|ref|XP\_004924430.1| PREDICTED: serine protease inhibitor dipetalogastin [*Bombyx*  
522 *mori*]  
523 gi|550239047|gb|JAB62011.1| Serine protease inhibitor dipetalogastin, partial [*Anoplophora*  
524 *glabripennis*]  
525 gi|577744249|gb|JAC03763.1| Serine protease inhibitor dipetalogastin [*Ceratitis capitata*]  
526 gi|604774863|gb|JAC09882.1| putative cpj010521 serine protease inhibitor dipetalogastin [*Aedes*  
527 *albopictus*]  
528 gi|642929560|ref|XP\_975339.2| PREDICTED: serine protease inhibitor dipetalogastin [*Tribolium*  
529 *castaneum*]  
530 gi|645016105|ref|XP\_008211344.1| PREDICTED: serine protease inhibitor dipetalogastin isoform  
531 X4 [*Nasonia vitripennis*]  
532 gi|749781027|ref|XP\_011144857.1| PREDICTED: serine protease inhibitor dipetalogastin  
533 [*Harpegnathos saltator*]  
534 gi|751453682|ref|XP\_011181276.1| PREDICTED: serine protease inhibitor dipetalogastin isoform  
535 X2 [*Bactrocera cucurbitae*]  
536 gi|755657405|gb|JAG73077.1| Serine protease inhibitor dipetalogastin, partial [*Fopius arisanus*]

537 gi|769834463|ref|XP\_011647333.1| PREDICTED: serine protease inhibitor dipetalogastin  
538 [Pogonomyrmex barbatus]  
539 gi|780042099|ref|XP\_011668235.1| PREDICTED: serine protease inhibitor dipetalogastin isoform  
540 X2 [Strongylocentrotus purpuratus]

541  
542 Bayesian phylogenetic inference was also performed (lset rates=gamma; prset aamodelpr = mixed;  
543 mcmc ngen=1,000,000; sumt burnin=200,000). The Bayesian tree was in broad agreement with the  
544 MP tree.

545

546

547

#### 548 **Accession Codes**

549 The genome assembly has been approved and given the accession number JRLE00000000 and  
550 BioProject PRJNA259363. All genome sequencing data has been deposited in the Sequence Read  
551 Archive (SRA) with accession number SRS749263. RNA-seq data is available as FASTQ files and  
552 were quality-checked and deposited in the SRA with accession SRR1790655.

## Supplementary References

1. Kvist S, Brugler MR, Goh TG, Giribet G, Siddall ME (2014) Pyrosequencing the salivary transcriptome of *Haemadipsa interrupta* (Annelida: Clitellata: Haemadipsidae): anticoagulant diversity and insight into the evolution of anticoagulation capabilities in leeches. *Invertebrate Biology* 133: 74-98.
2. Simpson JT, Wong K, Jackman SD, Schein JE, Jones SJ, et al. (2009) ABySS: a parallel assembler for short read sequence data. *Genome research* 19: 1117-1123.
3. Koren S, Schatz MC, Walenz BP, Martin J, Howard JT, et al. (2012) Hybrid error correction and de novo assembly of single-molecule sequencing reads. *Nature biotechnology* 30: 693-700.
4. Schatz M (2001) Metassembler.
5. Zhang M, Zhang Y, Scheuring CF, Wu C-C, Dong JJ, et al. (2012) Preparation of megabase-sized DNA from a variety of organisms using the nuclei method for advanced genomics research. *nature protocols* 7: 467-478.
6. Cao H, Hastie A, Cao D, Lam E, Sun Y, et al. (2014) Rapid detection of structural variation in a human genome using nanochannel-based genome mapping technology. *GigaScience* 3: 34.
7. Haas BJ, Papanicolaou A, Yassour M, Grabherr M, Blood PD, et al. (2013) De novo transcript sequence reconstruction from RNA-seq using the Trinity platform for reference generation and analysis. *Nature protocols* 8: 1494-1512.
8. Lam ET, Hastie A, Lin C, Ehrlich D, Das SK, et al. (2012) Genome mapping on nanochannel arrays for structural variation analysis and sequence assembly. *Nature biotechnology* 30: 771-776.
9. Cox MP, Peterson DA, Biggs PJ (2010) SolexaQA: At-a-glance quality assessment of Illumina second-generation sequencing data. *BMC bioinformatics* 11: 485.
10. Parra G, Bradnam K, Korf I (2007) CEGMA: a pipeline to accurately annotate core genes in eukaryotic genomes. *Bioinformatics* 23: 1061-1067.
11. Holt C, Yandell M (2011) MAKER2: an annotation pipeline and genome-database management tool for second-generation genome projects. *BMC bioinformatics* 12: 491.
12. Korf I (2004) Gene finding in novel genomes. *BMC bioinformatics* 5: 59.
13. Lomsadze A, Ter-Hovhannisyan V, Chernoff YO, Borodovsky M (2005) Gene identification in novel eukaryotic genomes by self-training algorithm. *Nucleic Acids Research* 33: 6494-6506.
14. Ter-Hovhannisyan V, Lomsadze A, Chernoff YO, Borodovsky M (2008) Gene prediction in novel fungal genomes using an ab initio algorithm with unsupervised training. *Genome research* 18: 1979-1990.
15. Consortium IAG (2010) Genome sequence of the pea aphid *Acyrtosiphon pisum*. *PLoS biology* 8: e1000313.
16. Stanke M, Waack S (2003) Gene prediction with a hidden Markov model and a new intron submodel. *Bioinformatics* 19: ii215-ii225.
17. Wu TD, Watanabe CK (2005) GMAP: a genomic mapping and alignment program for mRNA and EST sequences. *Bioinformatics* 21: 1859-1875.
18. Kent WJ (2002) BLAT—the BLAST-like alignment tool. *Genome research* 12: 656-664.
19. Oliphant TE (2007) Python for scientific computing. *Computing in Science & Engineering* 9: 10-20.
20. Hunter JD (2007) Matplotlib: A 2D Graphics Environment. *Computing in Science and Engg* 9: 90-95.
21. Quinlan AR, Hall IM (2010) BEDTools: a flexible suite of utilities for comparing genomic features. *Bioinformatics* 26: 841-842.

22. Dobin A, Davis CA, Schlesinger F, Drenkow J, Zaleski C, et al. (2013) STAR: ultrafast universal RNA-seq aligner. *Bioinformatics* 29: 15-21.
23. Pruitt KD, Brown GR, Hiatt SM, Thibaud-Nissen F, Astashyn A, et al. (2014) RefSeq: an update on mammalian reference sequences. *Nucleic acids research* 42: D756-D763.
24. Altschul SF, Gish W, Miller W, Myers EW, Lipman DJ (1990) Basic local alignment search tool. *Journal of molecular biology* 215: 403-410.
25. Blankenberg D, Kuster GV, Coraor N, Ananda G, Lazarus R, et al. (2010) Galaxy: a web-based genome analysis tool for experimentalists. *Current protocols in molecular biology*: 19.10. 11-19.10. 21.
26. Love MI, Huber W, Anders S (2014) Moderated estimation of fold change and dispersion for RNA-Seq data with DESeq2. *bioRxiv*.
27. Jones P, Binns D, Chang H-Y, Fraser M, Li W, et al. (2014) InterProScan 5: genome-scale protein function classification. *Bioinformatics* 30: 1236-1240.
28. Ramsköld D, Wang ET, Burge CB, Sandberg R (2009) An abundance of ubiquitously expressed genes revealed by tissue transcriptome sequence data. *PLoS computational biology* 5: e1000598.
29. Kurtz S, Phillippy A, Delcher AL, Smoot M, Shumway M, et al. (2004) Versatile and open software for comparing large genomes. *Genome biology* 5: R12.
30. Nikoh N, Hosokawa T, Moriyama M, Oshima K, Hattori M, et al. (2014) Evolutionary origin of insect–Wolbachia nutritional mutualism. *Proceedings of the National Academy of Sciences* 111: 10257-10262.
31. D.A. Case JTB, R.M. Betz, D.S. Cerutti, T.E. Cheatham, III, T.A. Darden, R.E. Duke, T.J. Giese, H. Gohlke, A.W. Goetz, N. Homeyer, S. Izadi, P. Janowski, J. Kaus, A. Kovalenko, T.S. Lee, S. LeGrand, P. Li, T. Luchko, R. Luo, B. Madej, K.M. Merz, G. Monard, P. Needham, H. Nguyen, H.T. Nguyen, I. Omelyan, A. Onufriev, D.R. Roe, A. Roitberg, R. Salomon-Ferrer, C.L. Simmerling, W. Smith, J. Swails, R.C. Walker, J. Wang, R.M. Wolf, X. Wu, D.M. York and P.A. Kollman (2015) AmberTools15. University of California, San Francisco: University of California, San Francisco.
32. Humphrey W, Dalke A, Schulten K (1996) VMD: visual molecular dynamics. *Journal of molecular graphics* 14: 33-38.
33. (2013) Molecular Operating Environment (MOE). 1010 Sherbooke St. West, Suite #910, Montreal, QC, Canada, H3A 2R7, 2015: Chemical Computing Group Inc., .
34. Egan M, Lee EK, Chiu JC, Coruzzi G, DeSalle R (2009) Gene orthology assessment with OrthologID. *Bioinformatics for DNA Sequence Analysis*: Springer. pp. 23-38.
35. Chiu JC, Lee EK, Egan MG, Sarkar IN, Coruzzi GM, et al. (2006) OrthologID: automation of genome-scale ortholog identification within a parsimony framework. *Bioinformatics* 22: 699-707.
36. Lienau EK, DeSalle R, Rosenfeld JA, Planet PJ (2006) Reciprocal illumination in the gene content tree of life. *Systematic biology* 55: 441-453.
37. Rosenfeld JA, DeSalle R, Lee EK, O’Grady P (2008) Using whole genome presence/absence data to untangle function in 12 *Drosophila* genomes. *Fly* 2: 291-299.
38. Stamatakis A (2014) RAxML version 8: a tool for phylogenetic analysis and post-analysis of large phylogenies. *Bioinformatics* 30: 1312-1313.
39. Whelan S, Goldman N (2001) A general empirical model of protein evolution derived from multiple protein families using a maximum-likelihood approach. *Mol Biol Evol* 18: 691-699.
40. Yang Z (1994) Maximum likelihood phylogenetic estimation from DNA sequences with variable rates over sites: approximate methods. *J Mol Evol* 39: 306-314.

41. Felsenstein J (1985) Confidence limits on phylogenies: an approach using the bootstrap. *Evolution*: 783-791.
42. Abascal F, Zardoya R, Telford MJ (2010) TranslatorX: multiple alignment of nucleotide sequences guided by amino acid translations. *Nucleic acids research*: gkq291.
43. Petersen TN, Brunak S, von Heijne G, Nielsen H (2011) SignalP 4.0: discriminating signal peptides from transmembrane regions. *Nature methods* 8: 785-786.
44. Afshinnekoo E, Meydan C, Chowdhury S, Jaroudi D, Boyer C, et al. (2015) Geospatial Resolution of Human and Bacterial Diversity with City-Scale Metagenomics. *Cell Systems*.
45. Otti O, Naylor RA, Siva-Jothy MT, Reinhardt K (2009) Bacteriolytic activity in the ejaculate of an insect. *The American Naturalist* 174: 292-295.
46. Garrison E, Marth G (2012) Haplotype-based variant detection from short-read sequencing. *arXiv preprint arXiv:12073907*.
47. Purcell S, Neale B, Todd-Brown K, Thomas L, Ferreira MA, et al. (2007) PLINK: a tool set for whole-genome association and population-based linkage analyses. *The American Journal of Human Genetics* 81: 559-575.
48. Paradis E, Claude J, Strimmer K (2004) APE: analyses of phylogenetics and evolution in R language. *Bioinformatics* 20: 289-290.
49. Schliep KP (2011) phangorn: Phylogenetic analysis in R. *Bioinformatics* 27: 592-593.
50. Hill AW, Guralnick RP (2010) GeoPhylo: an online tool for developing visualizations of phylogenetic trees in geographic space. *Ecography* 33: 633-636.
51. Koh, C.Y. and R.M. Kini, *Molecular diversity of anticoagulants from haematophagous animals*. *Thromb Haemost*, 2009. **102**(3): p. 437-453.
52. Ribeiro, J., *Role of saliva in blood-feeding by arthropods*. *Annual review of entomology*, 1987. **32**(1): p. 463-478.
53. Andersen, J.F., et al., *The role of salivary lipocalins in blood feeding by Rhodnius prolixus*. *Archives of insect biochemistry and physiology*, 2005. **58**(2): p. 97-105.
54. Gutiérrez, J.M. and A. Rucavado, *Snake venom metalloproteinases: Their role in the pathogenesis of local tissue damage*. *Biochimie*, 2000. **82**(9-10): p. 841-850.
55. Francischetti, I., T.N. Mather, and J. Ribeiro, *Cloning of a salivary gland metalloprotease and characterization of gelatinase and fibrin (ogen) lytic activities in the saliva of the Lyme disease tick vector < i > Ixodes scapularis < / i >*. *Biochemical and biophysical research communications*, 2003. **305**(4): p. 869-875.
56. Feng, J., et al., *Molecular cloning and characterization of < i > Ac < / i > -MTP-2, an astacin-like metalloprotease released by adult < i > Ancylostoma caninum < / i >*. *Molecular and biochemical parasitology*, 2007. **152**(2): p. 132-138.
57. Assumpção, T.C., et al., *An insight into the sialotranscriptome of Triatoma matogrossensis, a kissing bug associated with fogo selvagem in South America*. *The American journal of tropical medicine and hygiene*, 2012. **86**(6): p. 1005-1014.
58. Fry, B.G., et al., *The toxicogenomic multiverse: convergent recruitment of proteins into animal venoms*. *Annual review of genomics and human genetics*, 2009. **10**: p. 483-511.
59. Amino, R., A.S. Tanaka, and S. Schenkman, *Triapsin, an unusual activatable serine protease from the saliva of the hematophagous vector of Chagas' disease < i > Triatoma infestans < / i > (Hemiptera: Reduviidae)*. *Insect biochemistry and molecular biology*, 2001. **31**(4): p. 465-472.
